# Supplementary material for: Haplotyping by CRISPR-mediated DNA circularization (CRISPR-hapC) broadens allele-specific gene editing
Source: PubMed Central journal article supplement — Nucleic Acids Res. 2020 Jan 16;48(5):e25. doi: 10.1093/nar/gkz1233 (PMC7049710; doi:10.1093/nar/gkz1233), 2020-01-16
Supplement: gkz1233_supplemental_file.pdf [file gkz1233_supplemental_file.pdf]

## Supplementary Materials for

### Haplotyping by CRISPR-mediated DNA circularization (CRISPR-hapC) broadens allele-specific gene editing

Jiaying Yu <sup>1,2\*</sup>, Xi Xiang <sup>1-4\*</sup>, Jinrong Huang <sup>2-5\*</sup>, Xue Liang <sup>2\*</sup>, Xiaoguang Pan <sup>2</sup>, Zhanying Dong <sup>2</sup>, Trine Skov Petersen<sup>4</sup>, Kunli Qu <sup>2</sup>, Ling Yang <sup>2,3</sup>, Xiaoying Zhao <sup>1,2</sup>, Siyuan Li <sup>1,2</sup>, Tianyu Zheng <sup>1,2</sup>, Zhe Xu <sup>1,2</sup>, Chengxun Liu <sup>2</sup>, Peng Han <sup>2</sup>, Fengping Xu<sup>2-3</sup>, Huanming Yang <sup>3</sup>, Xin Liu <sup>3</sup>, Xiuqing Zhang <sup>3</sup>, Lars Bolund <sup>2-4</sup>, Yonglun Luo <sup>2-4,6‡</sup> and Lin Lin <sup>4,6‡</sup>

#### Affiliations

<sup>1</sup>BGI Education Center, University of Chinese Academy of Sciences, Shenzhen 518083, China.

<sup>2</sup>Lars Bolund Institute of Regenerative Medicine, BGI-Qingdao, Qingdao 266555, China.

<sup>3</sup>BGI-Shenzhen, Shenzhen 518083, China.

<sup>4</sup>Department of Biomedicine, Aarhus University, Aarhus 8000, Denmark.

<sup>5</sup>Department of Biology, University of Copenhagen, Copenhagen, Denmark.

<sup>6</sup>Steno Diabetes Center Aarhus, Aarhus University Hospital, Aarhus, Denmark

\* These authors contribute equally to the study and should be regarded as co-first authors.

‡Correspondence addressed to: Yonglun Luo: [luoyonglun@genomics.cn](mailto:luoyonglun@genomics.cn) or Lin Lin: [lin.lin@biomed.au.dk](mailto:lin.lin@biomed.au.dk)

**List of supplementary materials:**

1. Extended chapter for the CRISPR-hapC method.
2. Supplementary Figure Legends
3. Supplementary Figures
3. Supplementary Tables

## 1. Extended chapter for the CRISPR-hapC method

In this supplementary material, we provide a detail protocol for conducting the CRISPR-hapC method, which is a technique for haplotyping based on pair-gRNAs cleavage to form extrachromosomal circular DNA (eccDNA, or short for ECC in this protocol) in cells. The main application of CRISPR-hapC is to uncover the linkage between two heterozygous alleles in one chromosome, or known as haplotype (see extended **Fig. S1**). In this protocol, we exemplify the CRISPR-hapC with the 6 SNPs in chromosome 1 of HEK293 cells, of which the results were shown in Figure 1 and Supplementary Fig S1-S2.

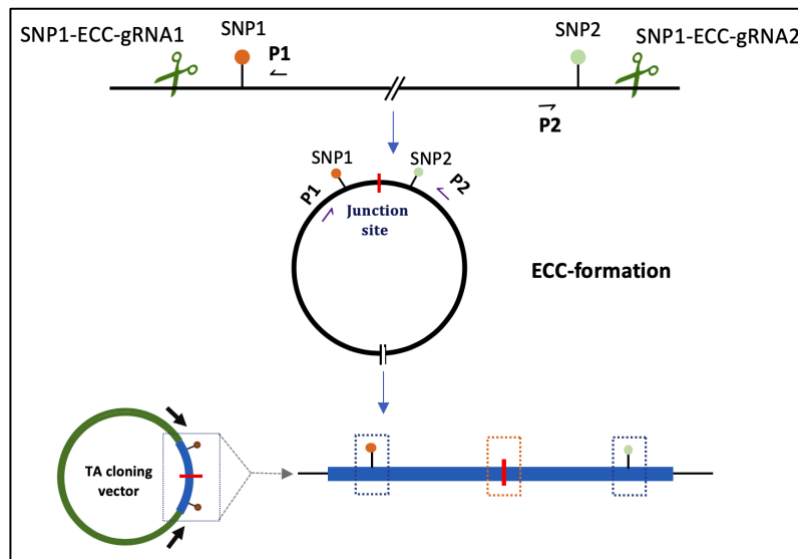

**Extended Fig.S1 Principle of CRISPR-hapC**

The Workflow of CRISPR-hapC generally comprise the following four steps: 1) Define the SNPs of interest in genome of target cells; For example, the asPAM SNPs can be retrieved from our database. [www.crispratlas.com](http://www.crispratlas.com); 2) Design CRISPR gRNAs in proximity to the SNPs which will be used to generate eccDNA in target cells by pair-gRNAs; 3) ECC detection by PCR; 4) TA-clone plus Sanger sequencing to uncover the linkage relationships of interested SNPs.

### Materials:

1. Target cells;
2. Cell transfection reagents (in this study, we used lipofectamine 2000 or X-tremegene 9 to perform transduction);
3. CRISPR gRNA expression vectors (e.g. lentiCRISPRv2)
4. Protocols for generation of CRISPR vector can follow our simply LION method [1]. and vector construction related enzymes, reagents (for gRNA construction, please **refer to protocol in the appendix 1**)
5. PCR polymerase
6. TA-clone kit.
7. Competent cells
8. Plasmid safe DNA nuclease
9. Other reagents are listed in the protocol

### Step 1: prediction and validation of the SNPs in genome of target cells

The first step is to select the variants of interest, like the potential pathogenic SNPs, asPAM SNPs, etc. Generally, you can download the interested pathogenic variants from Clin Var database (<https://www.ncbi.nlm.nih.gov/clinvar/>). For asPAM SNPs, just use the database described in this study (<http://www.crispratlas.com/knockout>). Then confirm the existence of interested variants in your target cells by PCR and Sanger sequencing.

- 1) In this protocol, we selected 6 SNPs in chromosome 1 of HEK293T genome (Extended **Table S1 and Extended Fig S2**), which were downloaded from the HEK293genome database (<http://hek293genome.org/v2/>). We aimed to uncover the linkage relationships of SNP1 and the remaining SNPs.

**Extended Table S1. HEK293T SNPs selected in this protocol**

| Number | CHROM | POS       | REF | ALT | Distance from SNP1 |
|--------|-------|-----------|-----|-----|--------------------|
| SNP1   | chr1  | 11427039  | G   | A   | 0 bp               |
| SNP2   | chr1  | 11427699  | T   | A   | 660 bp             |
| SNP3   | chr1  | 11443564  | T   | G   | 16.5 kb            |
| SNP4   | chr1  | 11733278  | C   | T   | 306.2 kb           |
| SNP5   | chr1  | 58707134  | T   | C   | 47.2 Mb            |
| SNP6   | chr1  | 222783385 | G   | A   | 211.3 Mb           |
|        |       |           |     |     |                    |

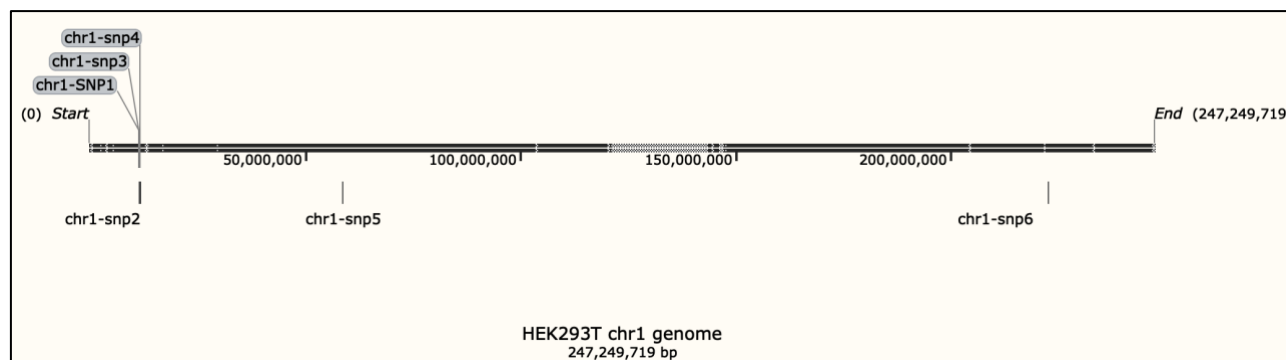

**Extended Fig. S2 selected SNPs in HEK293T chromosome 1**

- 2) To make sure the SNPs you are interested are present in the genome of target cells, conduct PCR and Sanger sequencing to confirm it. The primers for the 6 HEK293T SNPs detection are showed in Extended **Table S2**.

**Extended Table S2. Primers used for HEK293T Chr1-SNPs detection**

| Primer name     | Oligo sequence (5'-3') | Product length |
|-----------------|------------------------|----------------|
| CHR1-SNP1-SCR-F | AAGGAAGGTCGGTACTGGAGA  | 297 bp         |
| CHR1-SNP1-SCR-R | AGGGAAGGAAGACAGCAGAGAG |                |
| CHR1-SNP2-SCR-F | TCTAGCTCTGAGTGCCGCATCC | 353 bp         |

|                 |                        |        |
|-----------------|------------------------|--------|
| CHR1-SNP2-SCR-R | CCTGACTGCCACCTCTGTAAG  |        |
| CHR1-SNP3-SCR-F | GTGATTTGAATCTGGCAGCGTG | 379 bp |
| CHR1-SNP3-SCR-R | AGTGACTCCTAGATCACACAGC |        |
| CHR1-SNP4-SCR-F | AGTCCTGCCTGAGTGTTGCAAG | 295 bp |
| CHR1-SNP4-SCR-R | CACAGCCCATCTACAGAATTCC |        |
| CHR1-SNP5-SCR-F | AGGTCAACAGGGAGTCCTCATG | 248 bp |
| CHR1-SNP5-SCR-R | AAGGTCAGCCAGGCGGAATGTT |        |
| CHR1-SNP6-SCR-F | GCGCGTGGTCATTTAGGAAGCT | 378 bp |
| CHR1-SNP6-SCR-R | TCTCTGTGCCAATGGATCACTG |        |

We recommend using high-fidelity DNA polymerase to avoid false-positive SNPs which are introduced by PCR. The PCR reaction program depends on the polymerase you choose. we used platinum pfx polymerase (ThermoFisher Scientific) to conduct PCR reaction in this protocol (Extended **Table S3**).

**Extended Table S3. PCR reaction system for HEK293T Chr1 SNPs detection**

| Reagents                        | Volume        |
|---------------------------------|---------------|
| Genomic DNA                     | 100 ng        |
| Forward primer (5 $\mu$ M)      | 0.6 $\mu$ L   |
| Reverse primer (5 $\mu$ M)      | 0.6 $\mu$ L   |
| dNTP (10 mM)                    | 0.6 $\mu$ L   |
| Mg <sub>2</sub> SO <sub>4</sub> | 0.3 $\mu$ L   |
| platinum Pfx                    | 0.24 $\mu$ L  |
| 10 $\times$ Enhancer            | 3 $\mu$ L     |
| 10 $\times$ Pfx buffer          | 3 $\mu$ L     |
| H2O                             | To 15 $\mu$ L |

Thermocycles: 94°C 2min, (94 °C/20 s, 58 °C/30 s, 68 °C/45 s)  $\times$  35cycles, 68 °C 7 min, 4 °C 5 min. For most PCR, 58°C annealing works well.

3) Column- or gel-purify the PCR products and send for Sanger sequencing to confirm the existence of target SNPs (Extended **Fig. S3**).

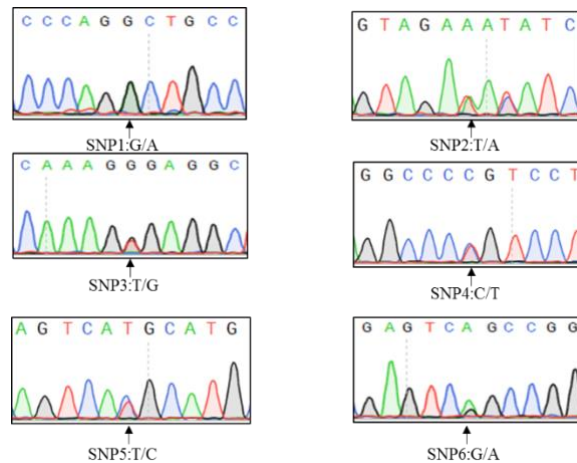

**Extended Fig. S3 Validation of 6 selected Chr1-SNPs of HEK293 cells by Sanger sequencing.**

## Step 2: Generation of eccDNA by pair-gRNAs

- 1) CRISPR-C design. After the validation of the genotype of target SNPs, design and construct a pair of gRNAs for generating eccDNA in cultured cells. Here we use the SpCas9 system. The SaCas9 system also works for CRISPR-C. Taking haplotyping of SNP1 and SNP2 as an example, **a gRNA upstream of SNP1 and a gRNA downstream of SNP2** were designed (extended **Fig. S1**), or known as flanking gRNAs. **OBS!** The distance between the SNP site and gRNA cleavage site is better to be 20 ~ 150 bp. This makes it easier to perform the subsequent eccDNA amplification PCRs. The gRNAs we used in this protocol is showed in Extended **Table S4** and the physical positions of these gRNAs and SNPs are showed in Extended **Fig. S4**.

**Extended Table S4. gRNAs used to form ECCs for detection of SNP linkage**

| ECC-gRNA name | gRNA sequence            | Distance from the target SNP site |
|---------------|--------------------------|-----------------------------------|
| CHR1-ECC-SNP1 | GACTGGAGAGAAGCTTCCCTGGG  | 101 bp                            |
| CHR1-ECC-SNP2 | TGACGGCACAGTTCGCAGAGAGG  | 36 bp                             |
| CHR1-ECC-SNP3 | GGTCTTGCATGTCACCATGCTGG  | 87 bp                             |
| CHR1-ECC-SNP4 | GCCTGGTCACATGGTGCCTAGG   | 28 bp                             |
| CHR1-ECC-SNP5 | TATACAGTGTAGCGGCCATGGAGG | 50 bp                             |
| CHR1-ECC-SNP6 | TCCCTGCTCCCACCGGAAATGGG  | 44 bp                             |

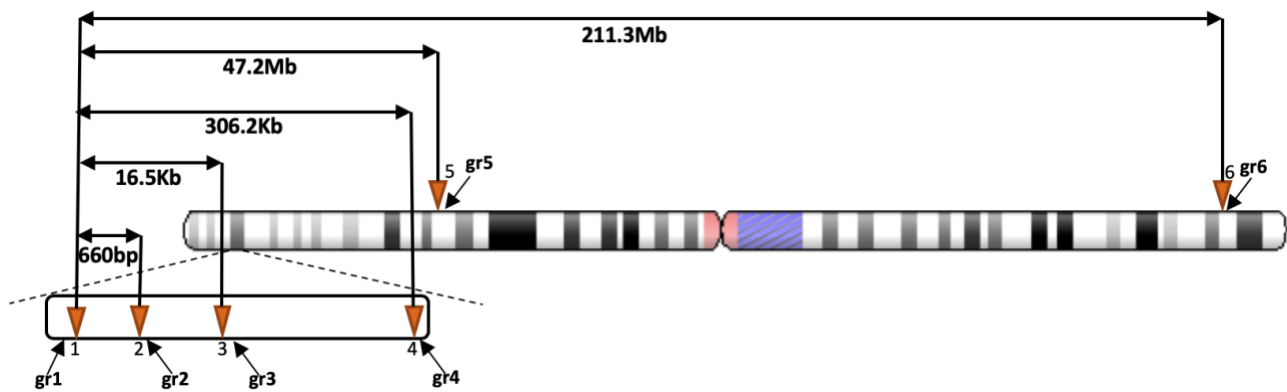

Extended Fig. S4 Physical positions of the selected gRNAs in chromosome 1 of HEK293T.

- 2) Transfection. Transfect pair-gRNAs in to the target cells. In our study, transfection was conducted with Lipofectamine 2000 transfection reagent (Invitrogen) or X-tremegene 9 (Roche) in 24-well plates according to the manufacturer's protocol. Briefly, 60,000 cells/per well were seeded in 24 well plates and the media were changed when cell confluence reaches 50~70% before transfection (typically 24 hours after seeding). For pair-gRNA co-transfection, 500 ng plasmid DNA contains 250 ng upstream gRNA and 250 ng downstream gRNA (Cas9 expression cassette is in the same plasmid as the gRNA) and 1.5 $\mu$ L Lipofectamine 2000 were diluted separately in Opti-MEM (Gibco) to a total volume of 25 $\mu$ L. The diluted DNA was added to the diluted Lipofectamine and mixed gently. After 15 min incubation at room temperature, the transfection mixture was homogeneously added to the adherent cells in a dropwise manner. We change medium 24 hours after transfection and harvest cells 24-48 hours later for eccDNA detection. Transfection with a single gRNA was used as controls.
- 3) The eccDNA detection by PCRs. The ECC will be formed 48 hours after pair-gRNAs transfection [2]. We had previously compared three different methods for eccDNA purification. The convenient cell lysate approach was used here. Briefly, transfected cells were suspended in 0.2 mL lysis buffer (KCl 50 mM, MgCl<sub>2</sub> 1.5 mM, 0.5% NP40 and 0.5% Tween 20, 10 mM Tris pH 8.5) and incubated with 10  $\mu$ l proteinase K (19.1 mg/mL, Thermo) for 2.5 hours at 55°C. Proteinase K was heat-inactivated at 95°C for 10 min, cooled down at room temperature for 15 min, and 32  $\mu$ l DNA solution was transferred for linear DNA removal with plasmid safe DNA nuclease, storing the rest of the cell lysate at -20°C until PCR analysis.

The primers for ECC detection should be downstream of SNP1 and upstream of SNP2 (showed in extended Fig. S1, or known as **inverse PCR primers**). And we suggest the distance between primer and SNP site is better to be 100 ~ 400 bp, then the final ECC PCR product would be less than 1000 bp (the optimal size is 400~600 bp). Primers used in this protocol are showed in extended Table S5. PCR reaction system for ECC detection is showed in extended Table S6. And PCR results of Chr1-SNPs ECC detection is showed in extended Fig. S5.

Extended Table S5. Primers for Chr1 SNP-linkage detection (ECC)

| Primer combination                | ECC product length |
|-----------------------------------|--------------------|
| CHR1-SNP1-SCR-R + CHR1-SNP2-SCR-F | 482 bp             |

|                                   |        |
|-----------------------------------|--------|
| CHR1-SNP1-SCR-R + CHR1-SNP3-SCR-F | 457 bp |
| CHR1-SNP1-SCR-R + CHR1-SNP4-SCR-F | 444 bp |
| CHR1-SNP1-SCR-R + CHR1-SNP5-SCR-F | 456 bp |
| CHR1-SNP1-SCR-R + CHR1-SNP6-SCR-F | 496 bp |

**Extended Table S6. PCR reaction system for ECC detection**

| Reagents              | Volume   |
|-----------------------|----------|
| Genomic DNA           | 100 ng   |
| Forward primer (5 μM) | 0.6 μL   |
| Reverse primer (5 μM) | 0.6 μL   |
| dNTP (10 mM)          | 0.6 μL   |
| MgSO4                 | 0.3 μL   |
| platinum Pfx          | 0.24 μL  |
| 10×Enhancer           | 3 μL     |
| 10×Pfx buffer         | 3 μL     |
| H2O                   | To 15 μL |

Thermocycles: 94°C 2min, (94 °C/20 s, 58 °C/30 s, 68 °C/45 s) × 35cycles, 68 °C 7 min, 4 °C 5 min.  
For most PCR, 58°C annealing works well.

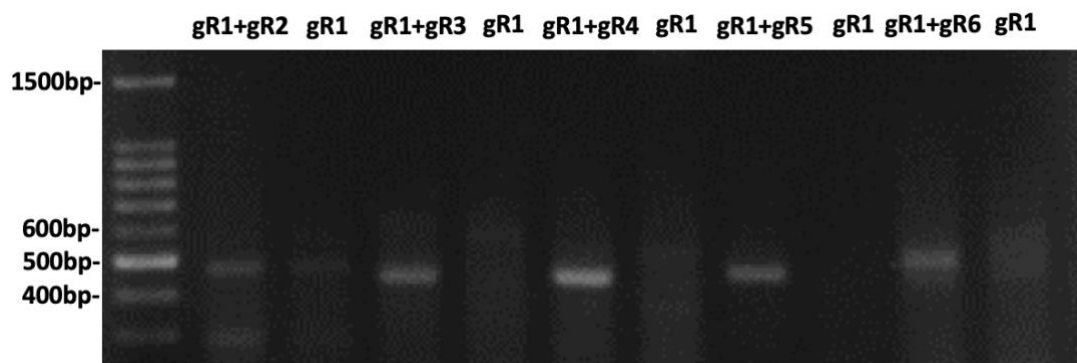

**Extended Fig. S5 PCR results of Chr1-SNPs ECC detection**

**Step 3: TA clone and Sanger sequencing**



- 1) Gel-purify the ECC-PCR products and clone to a TA-cloning vector. The PCR products amplified by pfx polymerase are blunt-ends. We firstly add an Adenine at 5' end of PCR fragments by rTaq polymerase (extended **Table S7**).

**Extended Table S7. Adenine extension of blunt-end PCR products**

| Reagents                   | Volume      |
|----------------------------|-------------|
| PCR products               | 17 $\mu$ L  |
| TAKARA rTaq (5 U/ $\mu$ L) | 0.1 $\mu$ L |
| 10 $\times$ PCR buffer     | 2 $\mu$ L   |
| dNTP (10 mM)               | 1 $\mu$ L   |

Incubate at 72°C for 1 hour.

- 2) Next, we used a T-vector pMD19 (TAKARA) to conduct TA cloning (extended **Table S8**).

**Extended Table S8. TA cloning**

| Reagents                | Volume    |
|-------------------------|-----------|
| T vector pMD19 (simple) | 1 $\mu$ L |
| PCR products with A     | 4 $\mu$ L |
| Solution I              | 5 $\mu$ L |

Incubate at room temperature for 1 hour then transform competent cells (**Attachment 1**).

- 3) After transformation, pick up bacterial clones for Sanger sequencing to analyze the linkage between tested SNPs.

### Attachment 1: protocol for gRNA assembly in our lab.

#### 1. Oligos annealing

|                              |            |
|------------------------------|------------|
| CrRNA oligo SS (100 $\mu$ M) | 1 $\mu$ L  |
| CrRNA oligo AS (100 $\mu$ M) | 1 $\mu$ L  |
| 10X NEB Buffer2              | 2 $\mu$ L  |
| H2O                          | 16 $\mu$ L |
| Total                        | 20 $\mu$ L |

95°C 5min, 95°C 10 sec ( -0.5°C/cycle) X150 cycles, 20°C 5min, 4°C hold

#### 2. Ligation

|                        |               |
|------------------------|---------------|
| Annealed CrRNA         | 1 $\mu$ L     |
| LentiCRISPRv2          | 100ng         |
| T4 ligase (FastDigest) | 0.5 $\mu$ L   |
| T4 ligase buffer       | 2 $\mu$ L     |
| BsmBI (FastDigest)     | 0.5 $\mu$ L   |
| H2O                    | To 20 $\mu$ L |

## CRISPR-hapC and asPAM CRISPR

10 cycles of 37°C for 5 min, 22C for 10 min  
1 cycle of 37°C for 30 min,<sup>[17]</sup><sub>[SEP]</sub>  
1 cycle of 75°C for 15 min,  
save at 4°C

### 3. Transformation

1) Prepare the following mixture and incubate on ice for 2-3min

|                  |       |
|------------------|-------|
| Ligation product | 1 µL  |
| KCM buffer       | 5 µL  |
| H2O              | 19 µL |

2) add 25 µL competent cells into 1), pipette up and down gently, keep on ice for 20 min, then let them sit at room temperature for 10min;

3) add 150 µL LB medium, incubate at 37 °C in a shaking incubator for 1 hour.

4) plate 50 µL 3) on AmpR LB plate, incubate at 37°C up-side-down for 16 hours (±2 hours).

5) pick up 2 colonies for each crRNA and screen for positive colonies by PCR (pick up 1 colony using a 10 µL tip and re-suspend the colony in 6 µL ampR LB medium by pipetting up and down gently; 1 µL for PCR screening and the remaining 5 µL for expansion).

6) Store the plates at 4°C.

7) Expand 1 positive colony for each crRNA overnight and extract the plasmids the next day.

## Reference

1. Xiang, X., et al., *LION: a simple and rapid method to achieve CRISPR gene editing*. Cell Mol Life Sci, 2019. **76**(13): p. 2633-2645.
2. Henrik Devitt Møller, L.L., Xi Xiang, Trine Skov Petersen, Jinrong Huang, Luhan Yang, Eigil Kjeldsen, Uffe Birk Jensen, Xiuqing Zhang, Xin Liu, Xun Xu, Jian Wang, Huanming Yang, George M Church, Lars Bolund, Birgitte Regenberg, Yonglun Luo,, *CRISPR-C: circularization of genes and chromosome by CRISPR in human cells*. Nucleic Acids Research, 2018: p. gky767.

## 2. Supplementary Figure Legends

### **Fig. S1. Genotyping of six SNPs in chromosome 1 of HEK293 cells**

(A) A list of the six heterozygous SNPs in HEK293 cells from the HEK293 genome database.

(B) Genotyping of the six SNPs in our HEK293 cells by Sanger sequencing.

### **Fig. S2. Haplotyping of the six SNPs in Chromosome 1 of HEK293 cells with CRISPR-hapC**

(A) PCR amplification of the eccDNA generated with the indicated CRISPR pair. Controls were transfection with single CRISPR vector (Cr1). White arrow heads indicate the corresponding eccDNA product.

(B) Illustration, Sanger sequencing and haplotyping of between SNP1 and the remaining SNPs.

(C) Summary of colonies with Sanger sequencing results supporting the haplotyping.

### **Fig. S3. Circos plot of the number of asPAM SNPs and CRISPRs across the human genome.**

Resolution: number of SNPs per 1M bin for the hg19 genome. The color codes are corresponding to the type of Cas systems, SaCas9 (red), SpCas9 (blue), xCas9 (orange) and Cas12a (green).

### **Fig. S4. Summary of HTT SaCas9 asPAM SNPs.**

Genome position, sequence for the reference and alternative SNP, heterozygous frequency based on human 1k genome, corresponding SNP if present in the human dbSNP, and consequence for PAM activity by the alternative SNP site are summarized.

### **Fig. S5. Illustration of the C-Check system for evaluating asPAM CRISPR specificity.**

CC-aPAM: C-Check vector with the asPAM CRISPR target site (protospacer) and an active PAM; CC-dPAM: C-Check vector with the asPAM CRISPR target site (protospacer) and a dead PAM; asPAM-Cr: asPAM CRISPR.

### **Fig. S6. Summary of TTR asPAM SNPs.**

Genome position, sequence for the reference and alternative SNP, heterozygous frequency based on human 1k genome, corresponding SNP if present in the human dbSNP, and consequence for PAM activity by the alternative SNP site are summarized.

### **Fig. S7. C-Check based evaluation of asPAM specificity**

Representative FACS analysis for EGFP positive (reflecting cleavage activity) and AsRED positive (indicating transfection efficiency) in HEK293T cells. TTR asPAM SNP 5, 8 and 9 are presented here. Minimum 10,000 cells were analyzed for each group, n=3.

### **Fig. S8. HTT asPAM SNP genotyping by Sanger sequencing.**

Sanger sequencing chromatograms for each HTT asPAM SNP are presented for three different cell lines. Black triangles indicate the SNP position. Sequences for heterozygous SNPs were indicated.

### **Fig. S9. Generation and evaluation of the activity of three HTT universal gRNAs.**

(A) Illustration of the HTT universal gRNA (UnigRNA) target sites

48 (B) Table of HTT unigRNA spacer sequences  
49 (C) Sanger sequencing of the unigRNA target sites (T1, T2, T3) in control cells and cells  
50 transiently transfected with the HTT unigRNA CRISPR. Black triangle indicates the  
51 expected cleavage site.

52

53 **Fig. S10. Chromatograms of Sanger sequencing-based genotyping of 14 asPAM SNPs in five**  
54 **cell lines.**

55

56 **Fig. S11. Generation of TTR mutated cells with CRISPR/SpCas9 and haplotyping with**  
57 **CRISPR-hapC.**

58 (A) Genotyping of HepG2 clone 21. Blue: protospacer sequences; Red: SpCas9 PAM.

59 (B) Haplotyping of the TTR exon2 mutation allele with TTR asPAM SNP3 by CRISPR-hapC.

60 Letters (P1 and P4) represent ECC genotyping primers. Top: Schematic illustration of  
61 the TTR locus and the procedure of CRISPR-hapC: ECC-DNA generated by CRISPR-C,  
62 ECC-DNA amplification by reverse PCR, subcloning and Sanger sequencing.

63

64 **Fig. S12. Genotyping of haplotype-specific deletion of TTR by asPAM CRISPR**

65 (A) Schematic illustration of the TTR locus, haplotypes, CRISPR target sites and  
66 genotyping primers (P6 – P9).

67 (B) Genotyping of asPAM specific TTR deletion by targeted PCR. Top, gel  
68 electrophoresis results of deletion specific PCR primers flanking the TTR-Uni-Cr and  
69 either TTR-asPAM-Cr11 or TTR-asPAM-Cr14. Bottom, the expected PCR amplicon after  
70 targeted deletion were indicated with rectangles and sequenced with Sanger sequencing.

71 The CRISPR gRNA spacers and PAM sequences were indicated.

72

73 **Table S1.** PCR primers for asPAM SNP genotyping

74 **Table S2.** CRISPR gRNA spacer sequences

75 **Table S3.** C-Check oligos

76 **Table S4.** PCR primers for CRISPR-hapC linkage analysis and PCRs

77 **Table S5.** Genotyping of TTR exon2 mutation clones and haplotype results by CRISPR-HapC.

78

79

Figure S1

A

| Number | CHROM | POS       | REF | ALT |
|--------|-------|-----------|-----|-----|
| SNP1   | chr1  | 11427039  | G   | A   |
| SNP2   | chr1  | 11427699  | T   | A   |
| SNP3   | chr1  | 11443564  | T   | G   |
| SNP4   | chr1  | 11733278  | C   | T   |
| SNP5   | chr1  | 58707134  | T   | C   |
| SNP6   | chr1  | 222783385 | G   | A   |

B

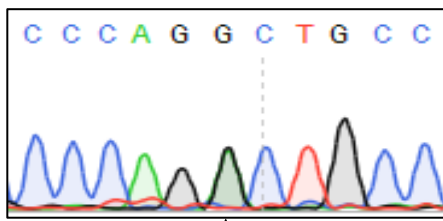

SNP1:G/A

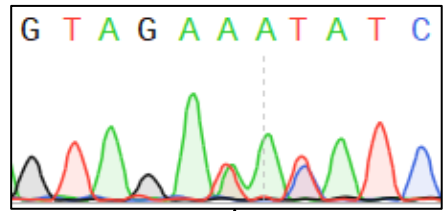

SNP2:T/A

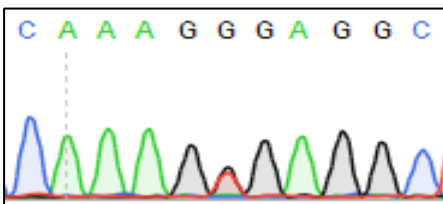

SNP3:T/G

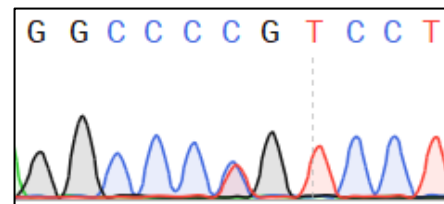

SNP4:C/T

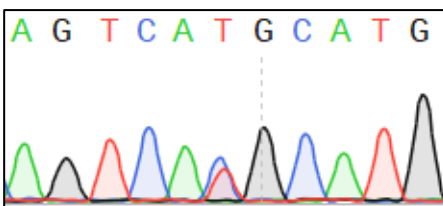

SNP5:T/C

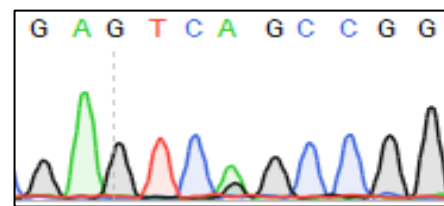

SNP6:G/A

Figure S2

A

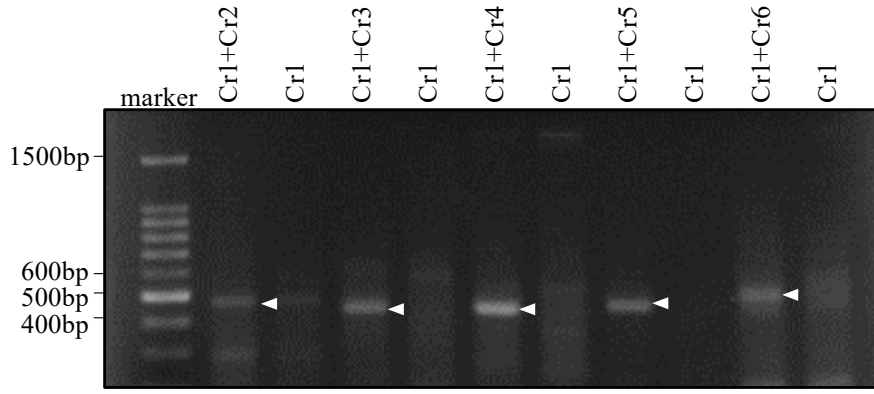

B

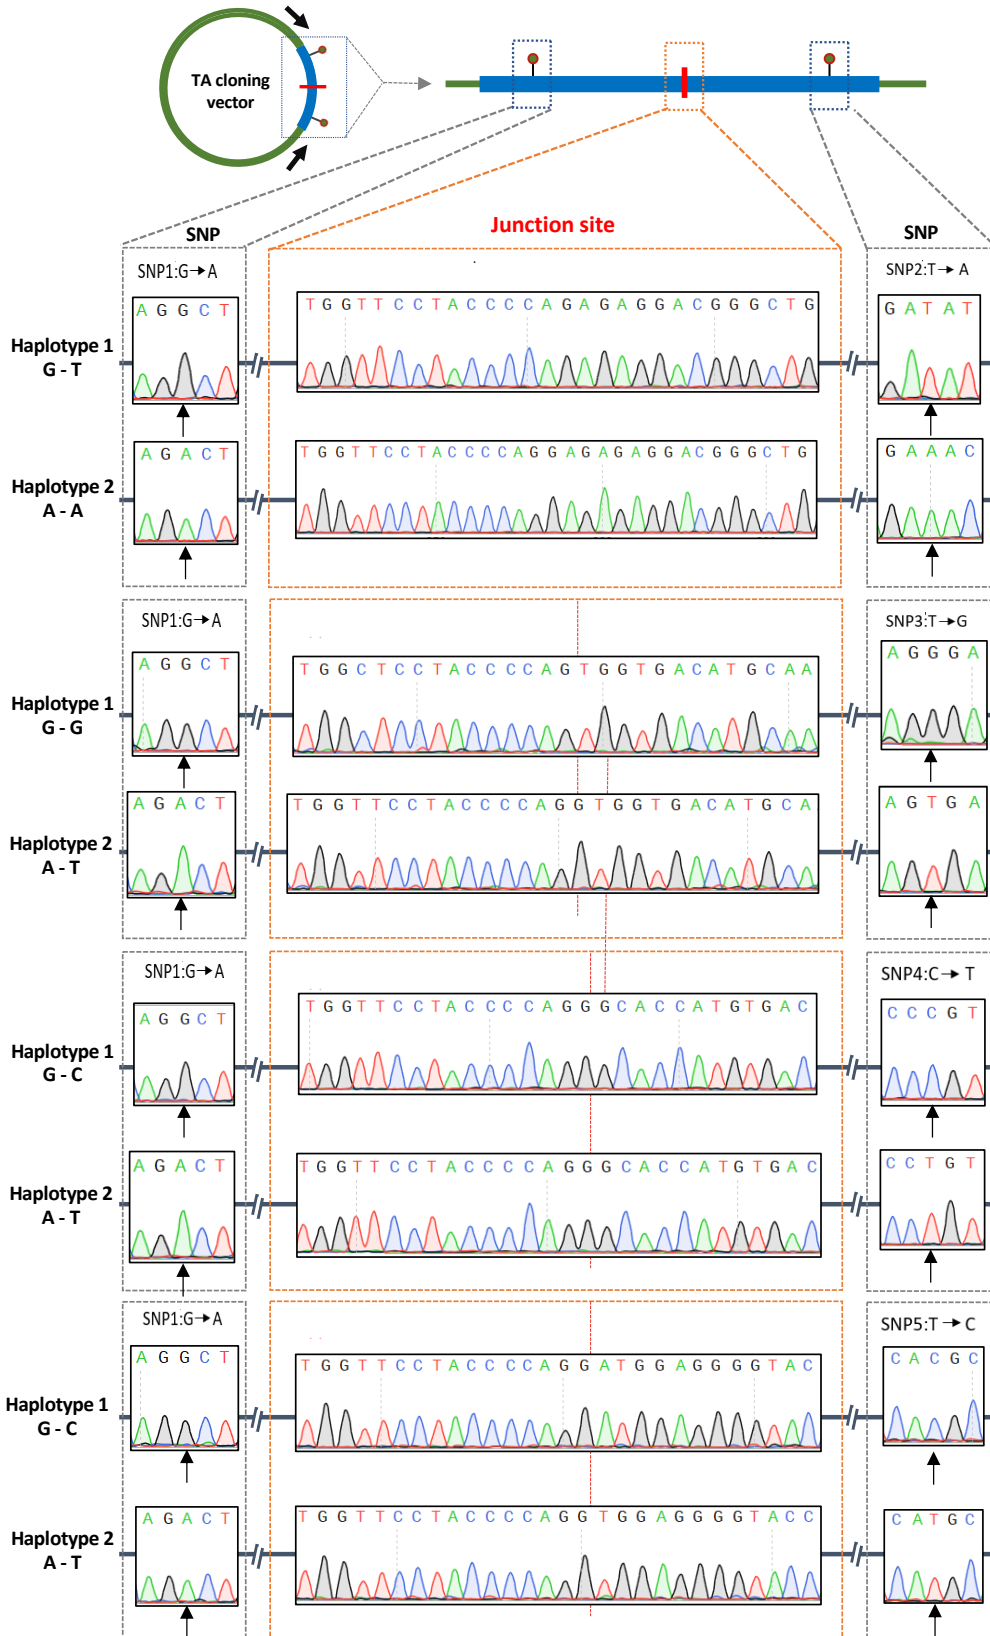

**Figure S2**

**C** Summary of Sanger sequencing results

|      |   | SNP2 |   | SNP3 |   | SNP4 |   | SNP5 |   | SNP6 |   |
|------|---|------|---|------|---|------|---|------|---|------|---|
|      |   | T    | A | G    | T | C    | T | C    | T | G    | A |
| SNP1 | G | 3    |   | 1    |   | 1    |   | 4    |   | 1    |   |
|      | A |      | 5 |      | 3 |      | 4 |      | 3 |      | 2 |

Figure S3

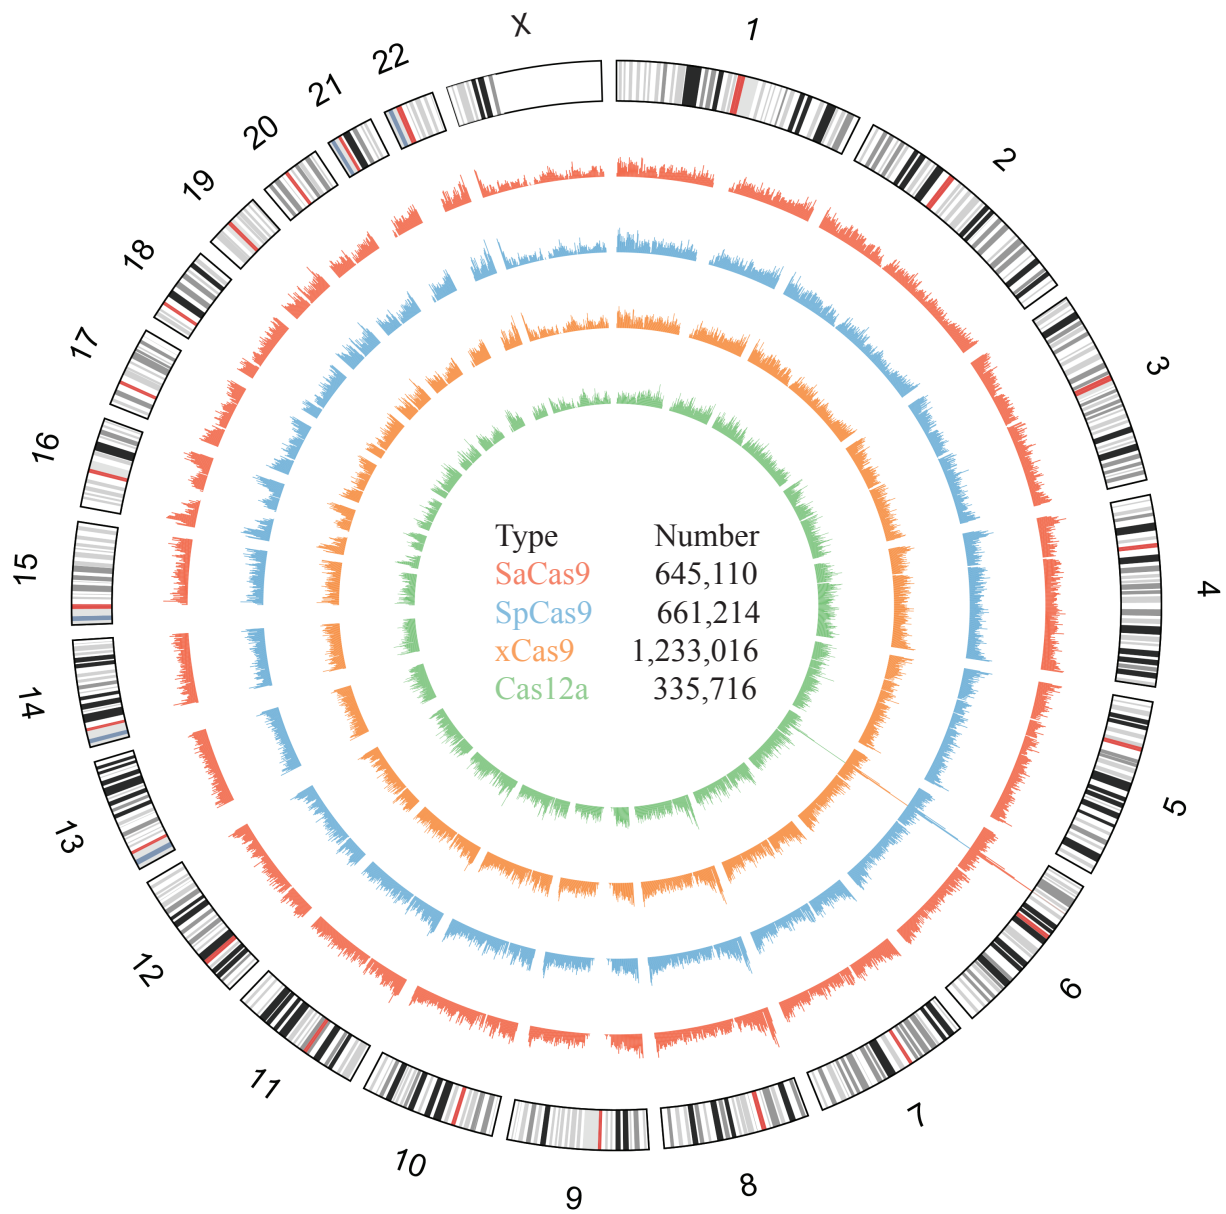



Figure S4

| HTT<br>asPAM SNP | Chr  | Pos     | REF | ALT | HetAF1000genomes | dbSNP      | PAM<br>alternation | PAM<br>Strand |
|------------------|------|---------|-----|-----|------------------|------------|--------------------|---------------|
| SNP1             | chr4 | 3080173 | G   | A   | G/A:0.47         | rs3856973  | dPAM               | +strand       |
| SNP2             | chr4 | 3097495 | G   | A   | G/A:0.38         | rs28820097 | dPAM               | +strand       |
| SNP3             | chr4 | 3098321 | C   | G   | C/G:0.40         | N.A.       | dPAM               | -strand       |
| SNP4             | chr4 | 3113337 | G   | A   | G/A:0.30         | rs16843836 | dPAM               | +strand       |
| SNP5             | chr4 | 3151813 | C   | T   | C/T:0.37         | rs11731237 | dPAM               | -strand       |
| SNP6             | chr4 | 3166250 | G   | A   | G/A:0.38         | rs9884693  | dPAM               | +strand       |
| SNP7             | chr4 | 3216815 | C   | G   | C/G:0.46         | rs916171   | aPAM               | -strand       |
| SNP8             | chr4 | 3234828 | G   | T   | G/T:0.47         | rs2269478  | dPAM               | +strand       |
| SNP9             | chr4 | 3236135 | G   | T   | G/T:0.38         | rs362270   | aPAM               | -strand       |

Figure S5

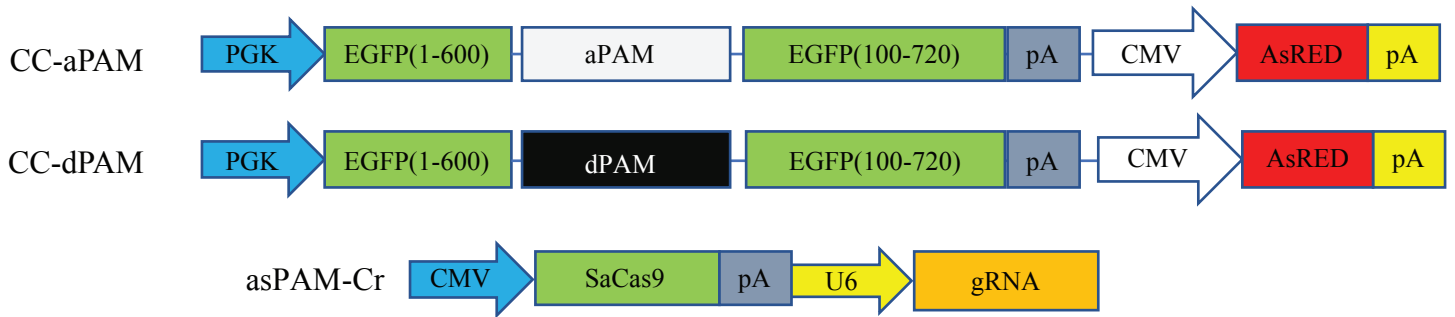

Figure S6

| <b>TTR asPAM<br/>SNP</b> | <b>CHROM</b> | <b>POS</b> | <b>REF</b> | <b>ALT</b> | <b>HetAF1000genomes</b> | <b>dbSNP</b> | <b>PAM<br/>alternation</b> | <b>PAM<br/>Strand</b> |
|--------------------------|--------------|------------|------------|------------|-------------------------|--------------|----------------------------|-----------------------|
| SNP1                     | chr4         | 29138749   | G          | A          | G/A:0.36                | rs1791202    | Loss of PAM                | +                     |
| SNP2                     | chr4         | 29139002   | C          | A,T        | C/T:0.40                | rs1667225    | Loss of PAM                | -                     |
| SNP3                     | chr4         | 29142751   | C          | G          | C/G:0.45                | -            | Loss of PAM                | -                     |
| SNP4                     | chr4         | 29146950   | G          | A,T        | G/A:0.44                | rs9963959    | Loss of PAM                | +                     |
| SNP5                     | chr4         | 29150290   | G          | A          | G/A:0.46                | rs9951041    | Loss of PAM                | +                     |
| SNP6                     | chr4         | 29151351   | A          | T          | A/T:0.44                | rs735329     | Loss of PAM                | +                     |
| SNP7                     | chr4         | 29155702   | C          | G          | C/G:0.40                | rs17660933   | Loss of PAM                | -                     |
| SNP8                     | chr4         | 29155949   | G          | C          | G/C:0.40                | rs11081702   | Loss of PAM                | +                     |
| SNP9                     | chr4         | 29156999   | C          | T          | C/T:0.41                | rs1375445    | Loss of PAM                | -                     |
| SNP10                    | chr4         | 29173680   | C          | G          | C/G:0.42                | -            | Loss of PAM                | -                     |
| SNP11                    | chr4         | 29176460   | C          | A          | C/A:0.41                | -            | Loss of PAM                | -                     |
| SNP12                    | chr4         | 29179040   | C          | T          | C/T:0.35                | rs1791228    | Loss of PAM                | -                     |
| SNP13                    | chr4         | 29189457   | C          | T          | C/T:0.44                | rs1791197    | Loss of PAM                | -                     |
| SNP14                    | chr4         | 29200724   | G          | A          | G/A:0.43                | rs974676     | Loss of PAM                | +                     |

Figure S7

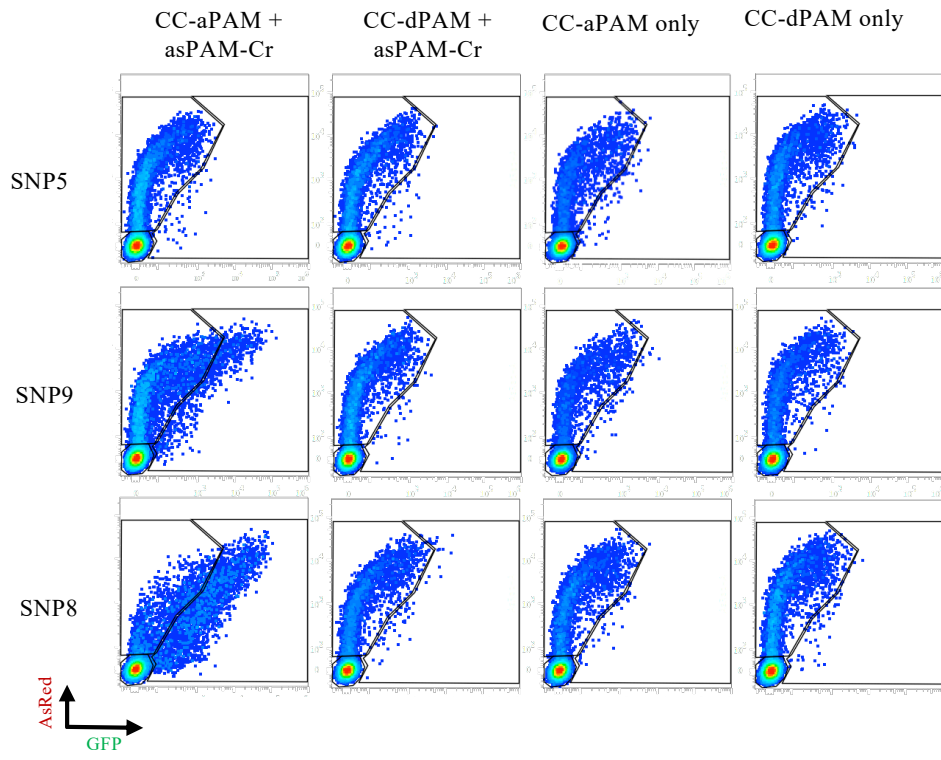

Figure S8

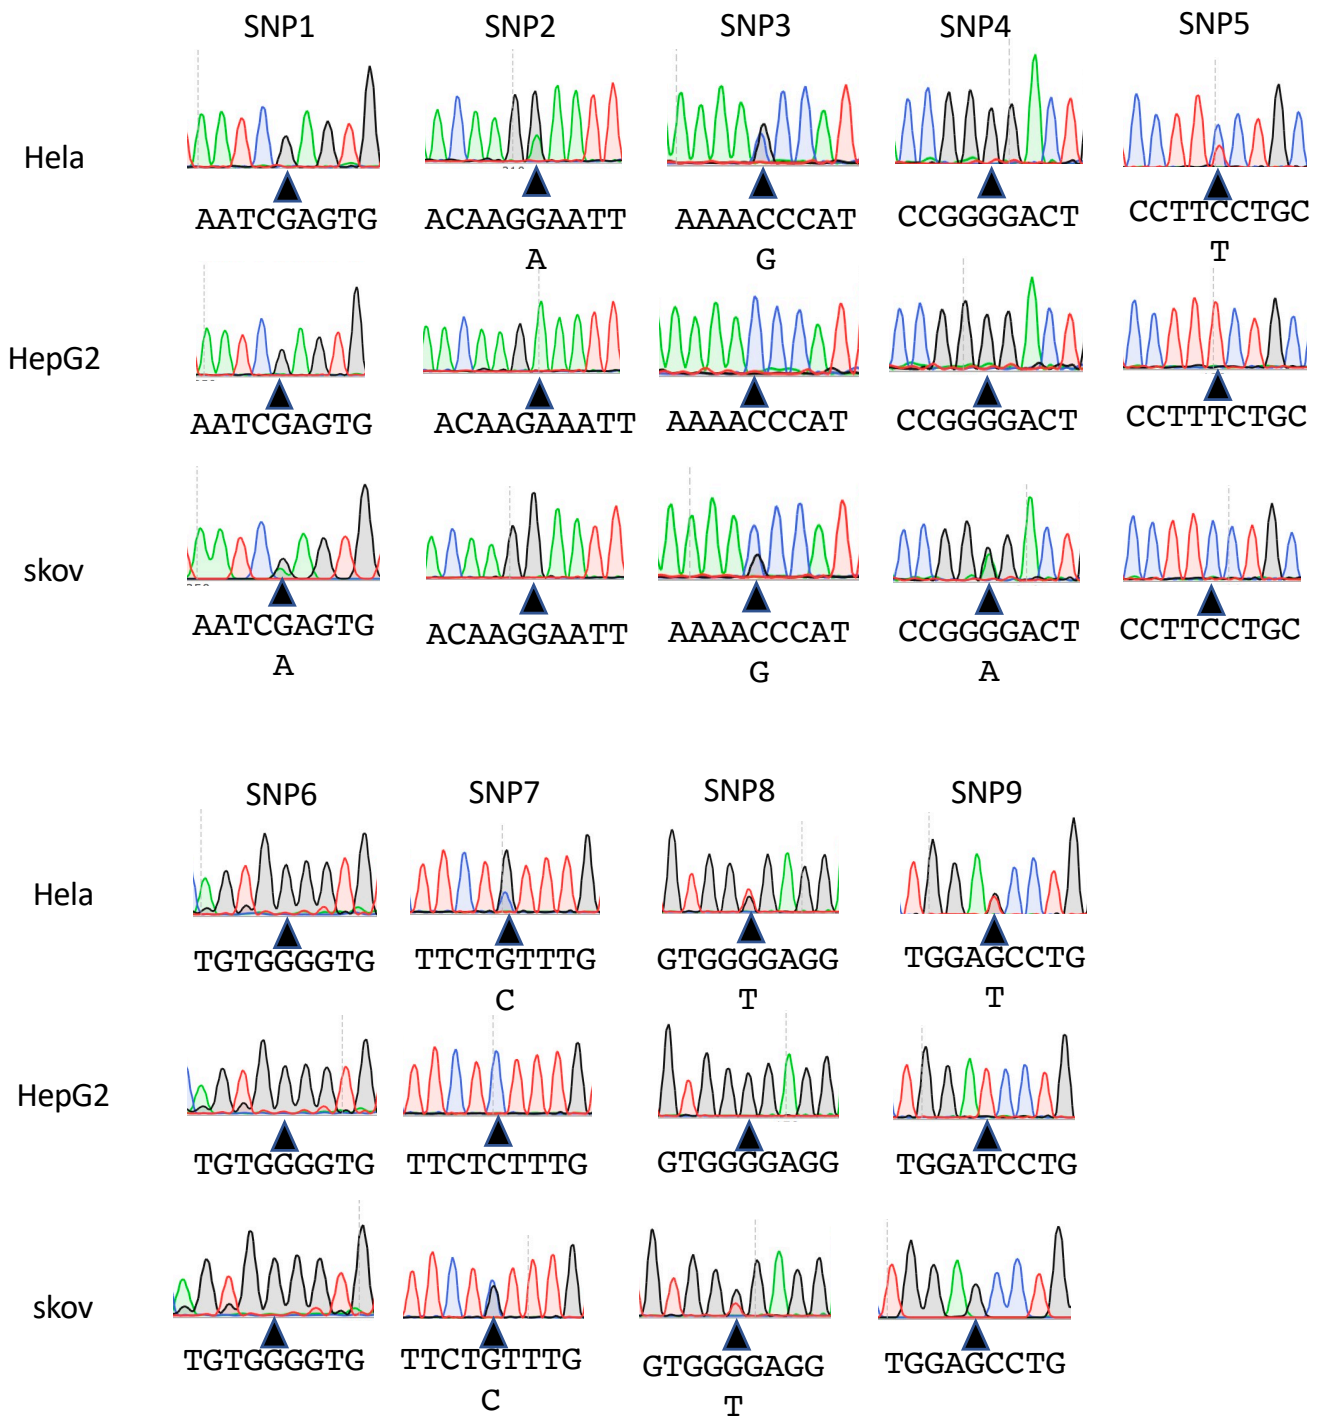

Figure S9

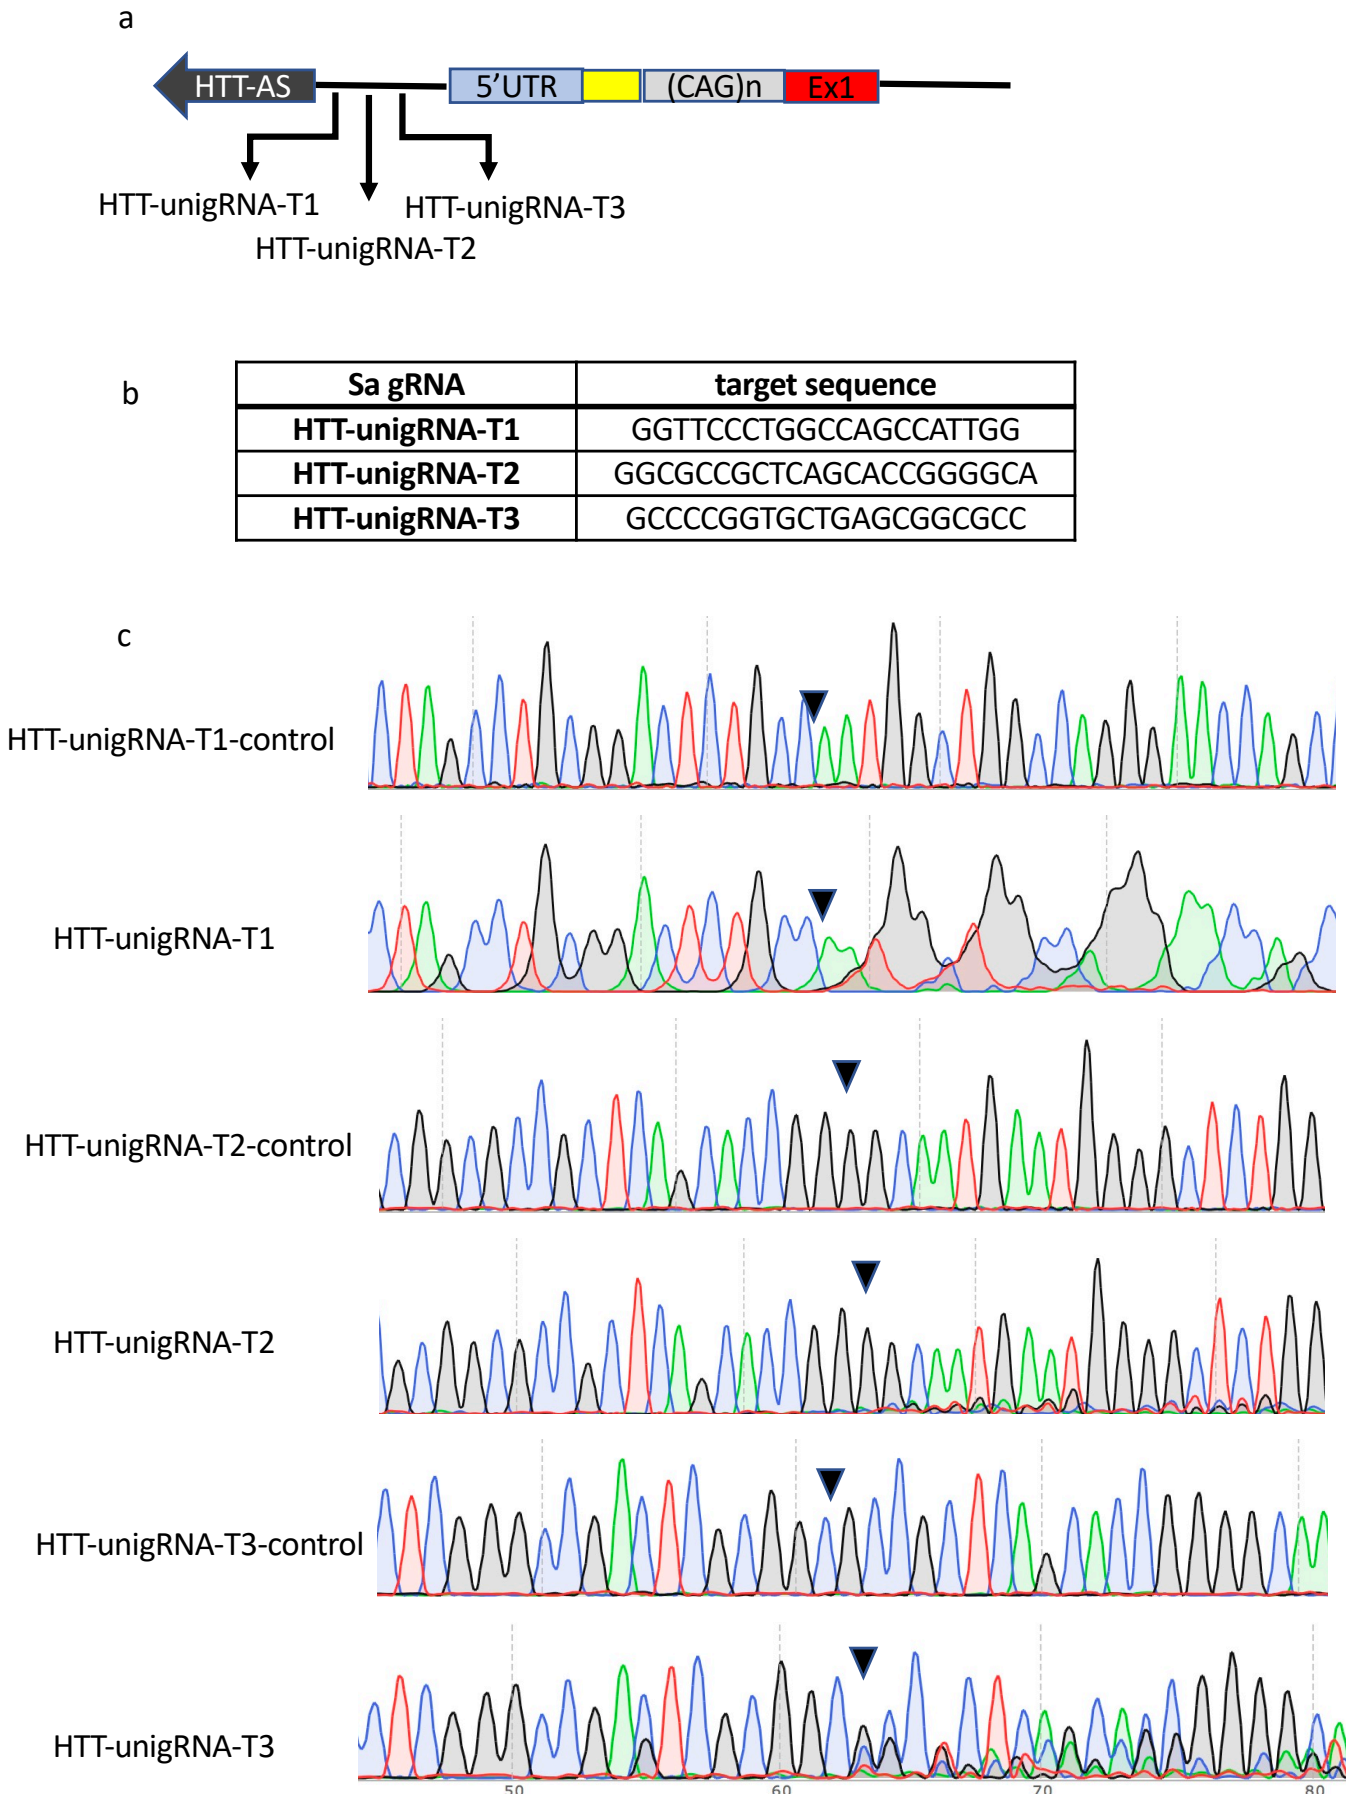

Figure S10

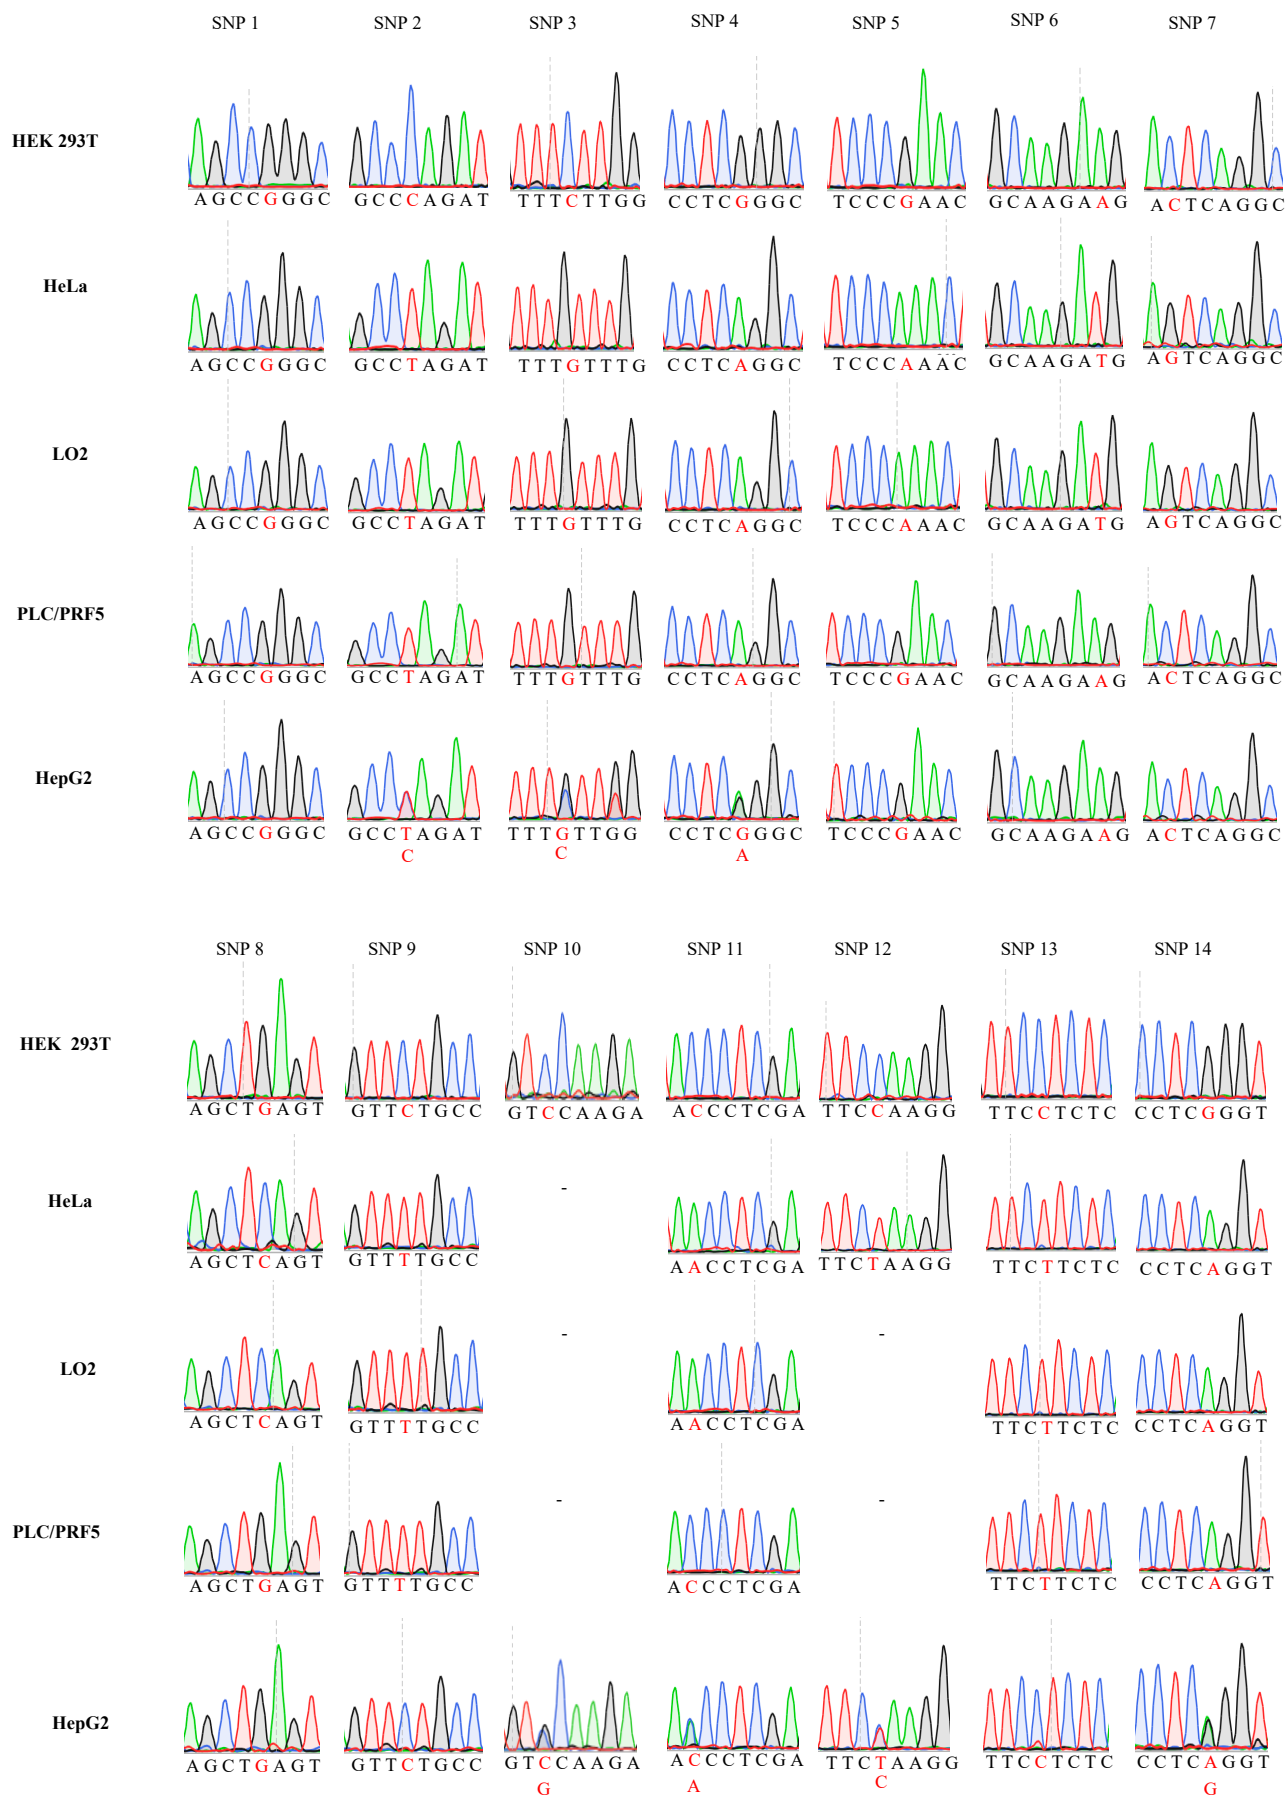

**Figure S11**

**A. TTR-mutation cell model—Genotype of clone #21**

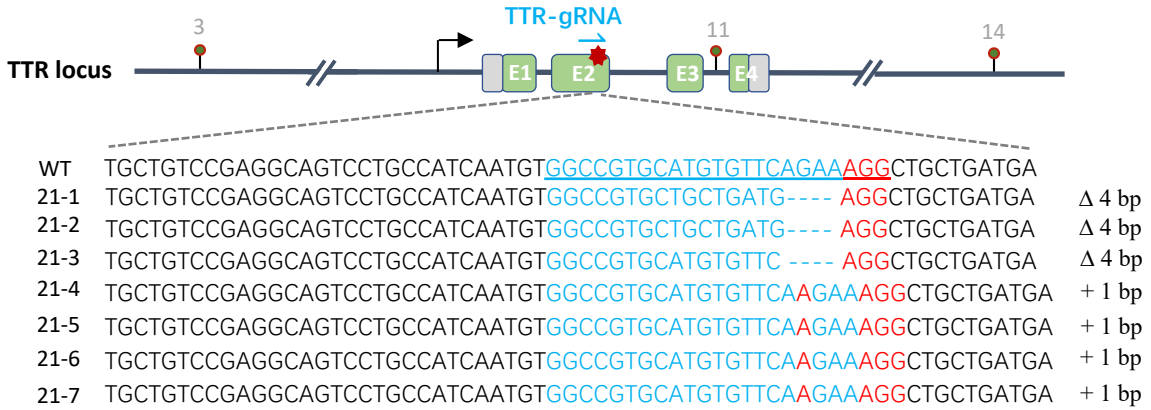

**B. TTR-mutation-SNP haplotyping**

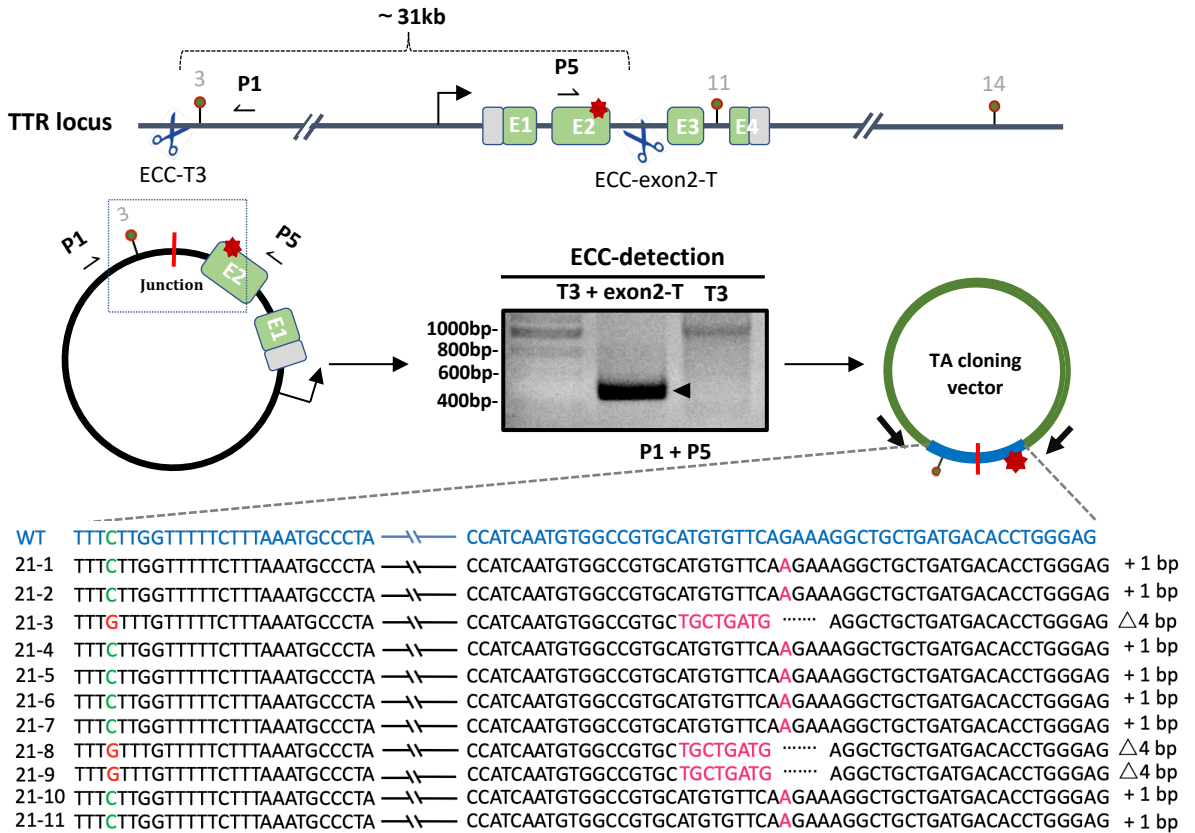



**Figure S12**

**A**

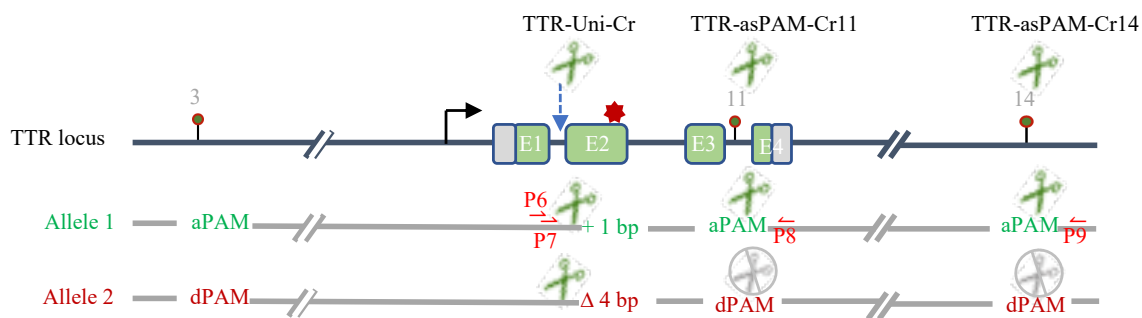

**B**

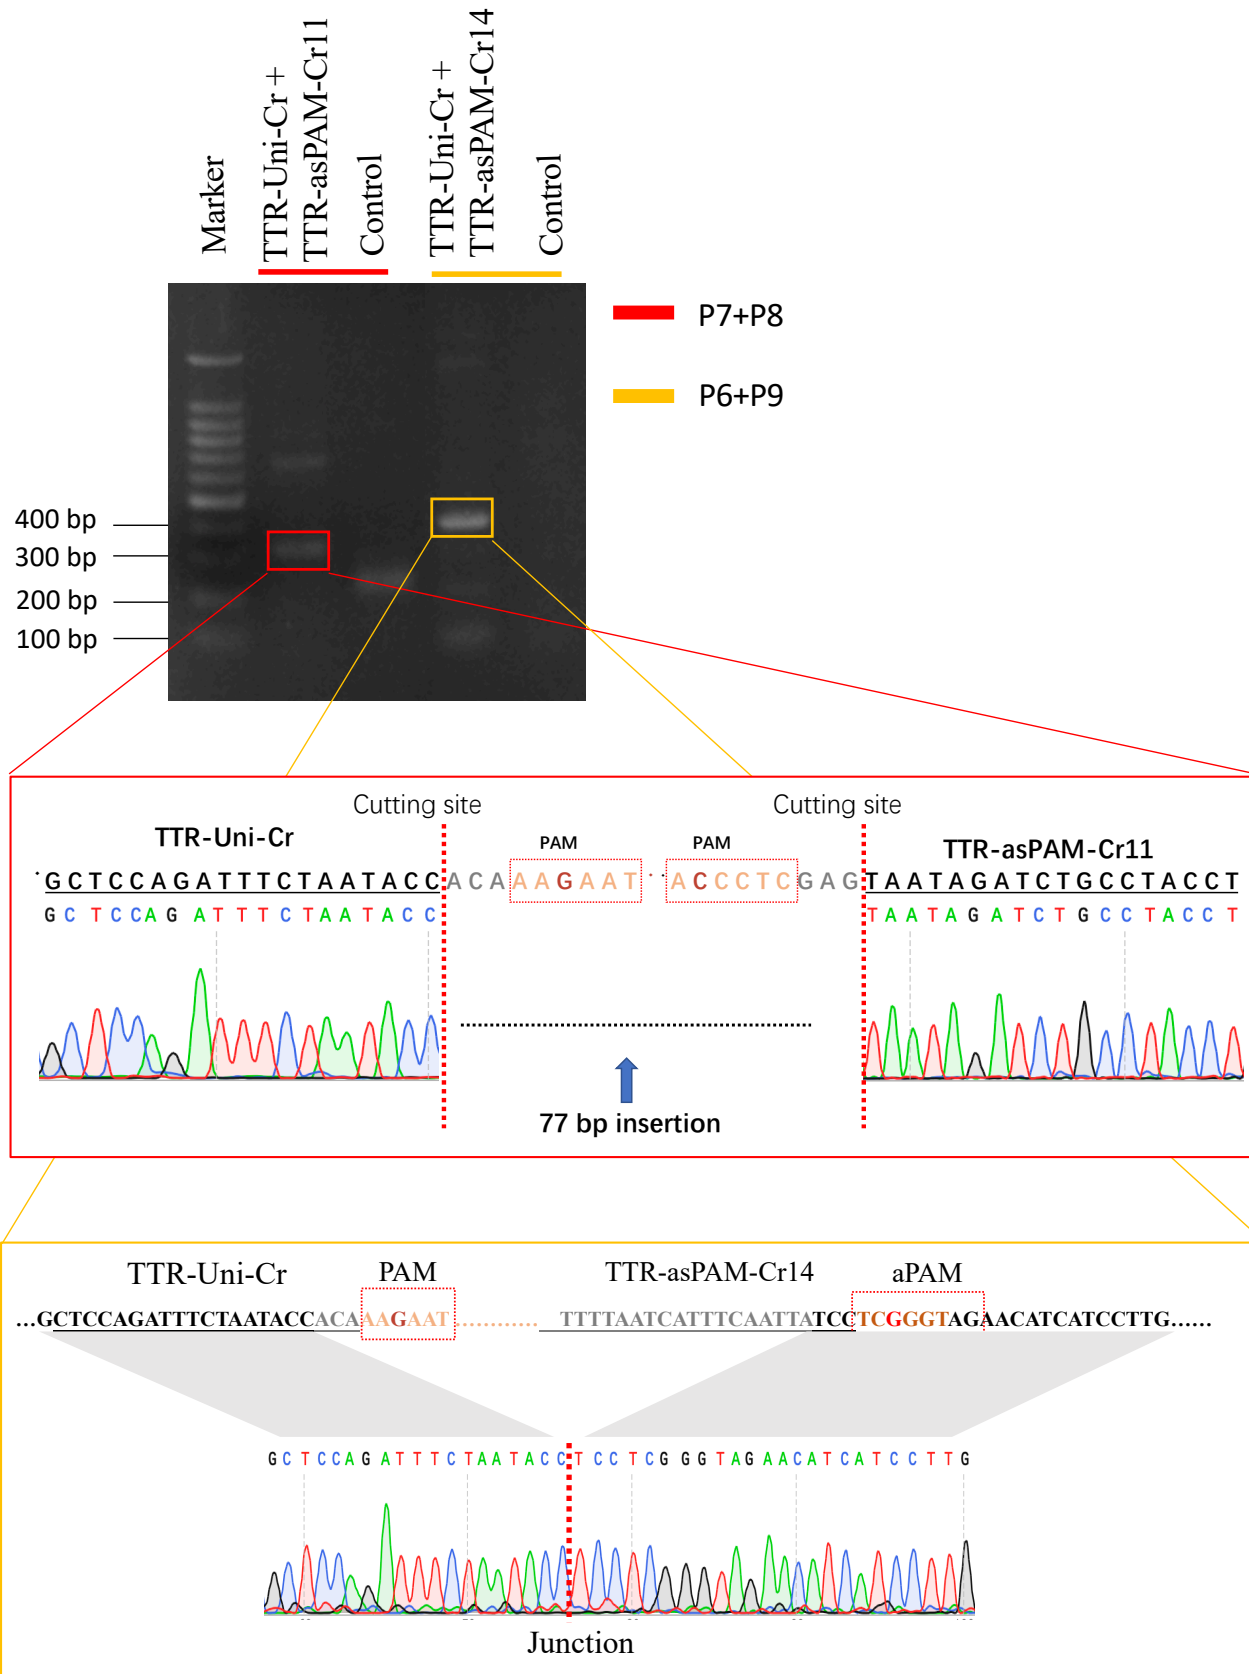

**Table S1. Primers for SNP genotyping PCRs**

| Primer name     | Oligo sequence (5'-3')   |
|-----------------|--------------------------|
| CHR1-SNP1-SCR-F | AAGGAAGGTCGGTGA CTGGAGA  |
| CHR1-SNP1-SCR-R | AGGGAAGGAAGACAGCAGAGAG   |
| CHR1-SNP2-SCR-F | TCTAGCTCTGAGTGCCGCATCC   |
| CHR1-SNP2-SCR-R | CCTGACTGCCCACCTCTGTAAG   |
| CHR1-SNP3-SCR-F | GTGATTTGAATCTGGCAGCGTG   |
| CHR1-SNP3-SCR-R | AGTGACTCCTAGATCACACAGC   |
| CHR1-SNP4-SCR-F | AGTCCTGCCTGAGTGTTGCAAG   |
| CHR1-SNP4-SCR-R | CACAGCCCATCTACAGAATTCC   |
| CHR1-SNP5-SCR-F | AGGTCAACAGGGAGTCTCATG    |
| CHR1-SNP5-SCR-R | AAGGTCAGCCAGGCGGAATGTT   |
| CHR1-SNP6-SCR-F | GCGCGTGGTCATTTAGGAAGCT   |
| CHR1-SNP6-SCR-R | TCTCTGTGCCAATGGATCACTG   |
| TTR-SNP1/2-F    | GTTCTCACTTATAAGTGGAAGC   |
| TTR-SNP1/2-R    | ATGAAACTGTGAAAGCTCCGAG   |
| TTR-SNP3-F      | CATCATCAGACAGTTCACCCCA   |
| TTR-SNP3-R      | AGCTCTGAGGCTTACAGGCAAT   |
| TTR-SNP4-F      | CATTGTGAGACAACCTGCAACC   |
| TTR-SNP4-R      | AAACCTGTCCCAACCCACTCCT   |
| TTR-SNP5-F      | CACCTAAACCTGAGCAGTGCTC   |
| TTR-SNP5-R      | GGGACTATGGGATATGCCACTA   |
| TTR-SNP6-F      | GGAGACAGTCAAAAGACCAGTG   |
| TTR-SNP6-R      | TATAAGGATAGACTGAGAGCCG   |
| TTR-SNP7/8-F    | ATTCCACCTCTACCTGATGAG    |
| TTR-SNP7/8-R    | CAGCTTACCCATCTCAGGAACT   |
| TTR-SNP9-F      | TTCCTAAGCTAGTGCTGTCTGC   |
| TTR-SNP9-R      | CAGAATCATCTGGAGGGCTTGT   |
| TTR-SNP10-F     | GCTAAGTGCCTTGTCTTAG      |
| TTR-SNP10-R     | CCACATGATTCTTCAACCAT     |
| TTR-SNP11-F     | CTGGCTTAGTCATGGATGAGAC   |
| TTR-SNP11-R     | GACAGATTAAGCAGGACCGTCA   |
| TTR-SNP12-F     | CTAGAAAGTATCTGGGCAGAAC   |
| TTR-SNP12-R     | TAGGCTGGTCTACGAACTCCT    |
| TTR-SNP13-F     | GGTCACACACCGAGTTACTA     |
| TTR-SNP13-R     | TGGTGTCAATACGCTACACAGT   |
| TTR-SNP14-F     | TGGCCGACGAATTTCAATTGT    |
| TTR-SNP14-R     | CATCTCCTTCTGAAGTACATG    |
| HTT-SNP1-SCR-F  | CAGCATA CAGGATGCAGGAGTTC |
| HTT-SNP1-SCR-R  | GCAGTGCATGTCTATAATCCCAGC |
| HTT-SNP2-SCR-F  | GGGCGAGGGAATTCCTTAATTTC  |
| HTT-SNP2-SCR-R  | TGTTTCTTGCAGGCAGCAGCATA  |
| HTT-SNP3-SCR-F  | ATGCTGGGCCATAAAACAAG     |

**Table S1. Primers for SNP genotyping PCRs**

|                 |                          |
|-----------------|--------------------------|
| HTT-SNP3-SCR-R  | TGGATTCCATTTGCTTGTC      |
| HTT-SNP4-SCR-F  | AGTAGAGCCAGAGTTTCACCATG  |
| HTT-SNP4-SCR-R  | AAGAAGAGCTCGGGCTTTGGAG   |
| HTT-SNP5-SCR-F  | ACATCTCTGGGCACTGCTCT     |
| HTT-SNP5-SCR-R  | CCCTGCCCAATACTGGAGCCA    |
| HTT-SNP6-SCR-F  | GCAATGTGGTGCTGAGAAGAATG  |
| HTT-SNP6-SCR-R2 | ACAAAGAGACTCCCACCCGG     |
| HTT-SNP7-SCR-F  | GAGATGGCCAACAGGAGACAGTC  |
| HTT-SNP7-SCR-R  | TGGACTACAGCCTCCCTGACAG   |
| HTT-SNP8-SCR-F  | GCAAGTTCTCAGCACCAACCCT   |
| HTT-SNP8-SCR-R  | CTGCTTCCTTCACAGCTCATTCTG |
| HTT-SNP9-SCR-F  | TTCAGACAGGAGGGAGGTGTGAG  |
| HTT-SNP9-SCR-R  | CGTGCCCAGTGATGCGTATATCT  |

**Table S2. List of gRNAs used in the study**

**Chromosome 1**

| <b>gRNA name</b> | <b>gRNA target site (5'- 3) * PAM</b> | <b>Function of gRNA</b>    |
|------------------|---------------------------------------|----------------------------|
| CHR1-ECC-Cr1     | GACTGGAGAGAAGCTTCCCTGGG               | SNP-linkage by CRISPR-hapC |
| CHR1-ECC-Cr2     | TGACGGCACAGTTCGCAGAGAGG               | SNP-linkage by CRISPR-hapC |
| CHR1-ECC-Cr3     | GGTCTTGCATGTCACCATGCTGG               | SNP-linkage by CRISPR-hapC |
| CHR1-ECC-Cr4     | GCCTGGTCACATGGTGCCTAGG                | SNP-linkage by CRISPR-hapC |
| CHR1-ECC-Cr5     | TATACAGTGTAGCGCCATGGAGG               | SNP-linkage by CRISPR-hapC |
| CHR1-ECC-Cr6     | TCCCTGCTCCCACCGGAAATGGG               | SNP-linkage by CRISPR-hapC |

**Table S2. List of gRNAs used in the study****TTR locus**

| <b>gRNA name</b>    | <b>gRNA target site (5' - 3') * PAM</b> | <b>Function of gRNA (strand +/-)</b>         |
|---------------------|-----------------------------------------|----------------------------------------------|
| TTR-asPAM-Cr1       | GAGCATGTAAACAATCTGCAG <b>CCGGGC</b>     | Allele-specific target<br>+                  |
| TTR-asPAM-Cr2       | <b>GCCCAG</b> ATGACAAAGACTATGCTTTAA     | Allele-specific target<br>-                  |
| TTR-asPAM-Cr3       | <b>TTTCTT</b> GGTTTTTCTTTAAATGCCCTA     | Allele-specific target<br>-                  |
| TTR-asPAM-Cr4       | TATGCAATCTCCATGCTTT <b>CTCGGGC</b>      | Allele-specific target<br>+                  |
| TTR-asPAM-Cr5       | GACTTGGGCCTTGAGAGGT <b>TCCGAAC</b>      | Allele-specific target<br>+                  |
| TTR-asPAM-Cr6       | ACAAATGCACCGCACCGATGC <b>AAGAAG</b>     | Allele-specific target<br>+                  |
| TTR-asPAM-Cr7       | <b>ACTCAG</b> GCAAAGTCAGACTCAGACCAA     | Allele-specific target<br>-                  |
| TTR-asPAM-Cr8       | CCCTGTCCACAGAAGT <b>CCCAGCTGAGT</b>     | Allele-specific target<br>+                  |
| TTR-asPAM-Cr9       | <b>GTTCTG</b> CCCTGTTAACGAAATAGGAAT     | Allele-specific target<br>-                  |
| TTR-asPAM-Cr10      | <b>GTCCA</b> AGAGTGGCTTCTCACCTTCATT     | Allele-specific target<br>-                  |
| TTR-asPAM-Cr11      | <b>ACCCTC</b> GAGTAATAGATCTGCCTACCT     | Allele-specific target<br>-                  |
| TTR-asPAM-Cr12      | <b>TTCCA</b> AGGGCCACTTCTTTACTGTGG      | Allele-specific target<br>-                  |
| TTR-asPAM-Cr13      | <b>TTCTCT</b> CAGCGGTTACATCTAGGAG       | Allele-specific target<br>-                  |
| TTR-asPAM-Cr14      | TTTTAATCATTTC <b>CAATTATCCTCGGGT</b>    | Allele-specific target<br>+                  |
| <b>TTR-Uni-Cr</b>   | GCTCCAGATTTCTAATACCACA <b>AAGAAT</b>    | Allele-specific KO<br>assistant gRNA +       |
| <b>TTR-ECC-Cr3</b>  | <b>CCA</b> AGGTTAAGGGCACTTCAGAA         | SNP-linkage<br>detection gRNA -              |
| <b>TTR-ECC-Cr11</b> | GAGCTGGGTCTCAGCCTGAT <b>GGG</b>         | SNP-linkage<br>detection gRNA +              |
| <b>TTR-ECC-Cr14</b> | TGTTTCACAGATAATGGCAG <b>AGG</b>         | SNP-linkage<br>detection gRNA +              |
| <b>TTR-exon2-T</b>  | TTGCCAAAGAACCCTCC <b>CACAGG</b>         | TTR-mutation cell<br>model construction<br>+ |

**Table S2. List of gRNAs used in the study**

**HTT locus**

|               |                                       |
|---------------|---------------------------------------|
| HTT-asPAM-Cr1 | GATAGGGAAATGTCAGGGTTAA <b>TCGAGT</b>  |
| HTT-asPAM-Cr2 | GCAACAACATAAAAGCACACA <b>AGGAAT</b>   |
| HTT-asPAM-Cr3 | <b>ACCCATT</b> TCCACATGGCCCATGGGTCAG  |
| HTT-asPAM-Cr4 | GGCTATGTTTATCCTGCAACC <b>GGGGA</b>    |
| HTT-asPAM-Cr5 | <b>TTCCT</b> GCCCACCAGCACATGCTTTCTA   |
| HTT-asPAM-Cr6 | TTGATCTGCCTAATATTGACAG <b>TGGGGT</b>  |
| HTT-asPAM-Cr7 | <b>CTCTT</b> TGTTCTGTTGTAATTTTAGTTGC  |
| HTT-asPAM-Cr8 | GCAGCGCCCCCGCCTCGGCTGT <b>GGGGA</b>   |
| HTT-asPAM-Cr9 | <b>AGCCT</b> GGCATAGGGCCAAGTCACACGG   |
| HTT-Uni-Cr1   | GGTTCCTGGCCAGCCATTGG <b>CAGAGT</b>    |
| HTT-Uni-Cr2   | <b>ATTCATT</b> GCCCGGTGCTGAGCGGCGCC   |
| HTT-Uni-Cr3   | GCCCCGGTGCTGAGCGGCGCC <b>GCGAGT</b>   |
| HTT-ECC-Cr1   | <b>ACCCAG</b> AAAGCCTGCTAGACAAATTCC   |
| HTT-ECC-Cr2   | GGAGATTAGAATAATAAAAAT <b>GTGAAT</b>   |
| HTT-ECC-Cr3   | AAACAATAGATTTCTAAACTTGT <b>TGGGGT</b> |
| HTT-ECC-Cr4   | <b>ATCCCT</b> CTCAATCTTTGCCGGAGGTGGG  |
| HTT-ECC-Cr5   | GTCTCTGGGCCAGTGCTGTTCTA <b>GAGAGT</b> |
| HTT-ECC-Cr6   | GTAGGTCTCTAAGAACTTGCTTC <b>ATGAAT</b> |
| HTT-ECC-Cr7   | <b>ATCCAA</b> ACACACAGAGTAAGTCTCAGGAC |
| HTT-ECC-Cr8   | CAGGAGCAGCCACCTGCCCAG <b>CAGGGT</b>   |
| HTT-ECC-Cr9   | GGGCATGGAGGACTCAGGGAAG <b>GAGAGT</b>  |
|               |                                       |

Table S3. C-Check oligos used in the research (HTT and TTR locus)

|                        |                                                     |
|------------------------|-----------------------------------------------------|
| SagRNA-HTT-T1Ref-CC-SS | GTCGGATgatagggaaatgtcagggttaatcgagtataGGT           |
| SagRNA-HTT-T2Ref-CC-SS | GTCGGATgcaacaactaaaagcacaacaaggaatataGGT            |
| SagRNA-HTT-T3Ref-CC-SS | GTCGGATgctgacccatgggccatgtggaatgggtataGGT           |
| SagRNA-HTT-T4Ref-CC-SS | GTCGGATggctatgtttatcctgcaaccggggacataGGT            |
| SagRNA-HTT-T5Ref-CC-SS | GTCGGATgtagaaagcatgtgctgtgggcaggaagataGGT           |
| SagRNA-HTT-T6Ref-CC-SS | GTCGGATgttgatctgcctaattgacagtgggtataGGT             |
| SagRNA-HTT-T7Ref-CC-SS | GTCGGATgcaactaaaattacaacagaacaagagaataGGT           |
| SagRNA-HTT-T8Ref-CC-SS | GTCGGATgcagcgcccccgctcgctgtggggagataGGT             |
| SagRNA-HTT-T9Ref-CC-SS | GTCGGATgccgtgtgacttggccctatgccaggctataGGT           |
| SagRNA-HTT-T1Alt-CC-SS | GTCGGATgatagggaaatgtcagggttaatcaagtataGGT           |
| SagRNA-HTT-T2Alt-CC-SS | GTCGGATgcaacaactaaaagcacaacaagaaatataGGT            |
| SagRNA-HTT-T3Alt-CC-SS | GTCGGATgctgacccatgggccatgtggaatggctataGGT           |
| SagRNA-HTT-T4Alt-CC-SS | GTCGGATggctatgtttatcctgcaaccgggagacataGGT           |
| SagRNA-HTT-T5Alt-CC-SS | GTCGGATgtagaaagcatgtgctgtgggcagaaagataGGT           |
| SagRNA-HTT-T6Alt-CC-SS | GTCGGATgttgatctgcctaattgacagtgggtataGGT             |
| SagRNA-HTT-T7Alt-CC-SS | GTCGGATgcaactaaaattacaacagaacaacagaataGGT           |
| SagRNA-HTT-T8Alt-CC-SS | GTCGGATgcagcgcccccgctcgctgtgtgagataGGT              |
| SagRNA-HTT-T9Alt-CC-SS | GTCGGATgccgtgtgacttggccctatgccaggatataGGT           |
| SagRNA-HTT-T1Ref-CC-AS | CGGTACctatACT CGA TTA ACC CTG ACA TTT CCC TAT CaTC  |
| SagRNA-HTT-T2Ref-CC-AS | CGGTACctatATT CCT TGT TGT GCT TTT AGT TGT TGCaTC    |
| SagRNA-HTT-T3Ref-CC-AS | CGGTACctatACC CAT TTC CAC ATG GCC CAT GGG TCA GCaTC |
| SagRNA-HTT-T4Ref-CC-AS | CGGTACctatGTC CCC GGT TGC AGG ATA AAC ATA GCCaTC    |
| SagRNA-HTT-T5Ref-CC-AS | CGGTACctatCTT CCT GCC CAC CAG CAC ATG CTT TCT ACaTC |
| SagRNA-HTT-T6Ref-CC-AS | CGGTACctatACC CCA CTG TCA ATA TTA GGC AGA TCA ACaTC |
| SagRNA-HTT-T7Ref-CC-AS | CGGTACctatTCT CTT TGT TCT GTT GTA ATT TTA GTT GCaTC |
| SagRNA-HTT-T8Ref-CC-AS | CGGTACctatCTC CCC ACA GCC GAG GCG GGG GCG CTG CaTC  |
| SagRNA-HTT-T9Ref-CC-AS | CGGTACctatAGC CTG GCA TAG GGC CAA GTC ACA CGG CaTC  |

**Table S3. C-Check oligos used in the research (HTT and TTR locus)**

|                        |                                                     |
|------------------------|-----------------------------------------------------|
| SagRNA-HTT-T1Alt-CC-AS | CGGTACctatACT TGA TTA ACC CTG ACA TTT CCC TAT CaTC  |
| SagRNA-HTT-T2Alt-CC-AS | CGGTACctatATT TCT TGT TGT GCT TTT AGT TGT TGCaTC    |
| SagRNA-HTT-T3Alt-CC-AS | CGGTACctatAGC CAT TTC CAC ATG GCC CAT GGG TCA GCaTC |
| SagRNA-HTT-T4Alt-CC-AS | CGGTACctatGTC TCC GGT TGC AGG ATA AAC ATA GCCaTC    |
| SagRNA-HTT-T5Alt-CC-AS | CGGTACctatCTT TCT GCC CAC CAG CAC ATG CTT TCT ACaTC |
| SagRNA-HTT-T6Alt-CC-AS | CGGTACctatACC TCA CTG TCA ATA TTA GGC AGA TCA ACaTC |
|                        |                                                     |
| SagRNA-HTT-T7Alt-CC-AS | CGGTACctatTCT GTT TGT TCT GTT GTA ATT TTA GTT GCaTC |
| SagRNA-HTT-T8Alt-CC-AS | CGGTACctatCTC ACC ACA GCC GAG GCG GGG GCG CTG CaTC  |
| SagRNA-HTT-T9Alt-CC-AS | CGGTACctatATC CTG GCA TAG GGC CAA GTC ACA CGG CaTC  |



**Table S3. C-Check oligos used in the research (HTT and TTR locus)**

| Oligo name        | Ordered oligo sequence(5' -3' )            |
|-------------------|--------------------------------------------|
| TTR-T1 (R-CC)-SS  | GTCGGAtgagcatgtaaacaatctgcagCCGGGCataGGT   |
| TTR-T1 (R-CC)-AS  | CGGTACctatGCCCCGctgcagattgtttacatgctcaTC   |
| TTR-T1 (A-CC)-SS  | GTCGGAtgagcatgtaaacaatctgcagCCAGGCataGGT   |
| TTR-T1 (A-CC)-AS  | CGGTACctatGCCTGGctgcagattgtttacatgctcaTC   |
| TTR-T2 (R-CC)-SS  | GTCGGAtttaaagcatagtctttgtcatCTGGGCataGGT   |
| TTR-T2 (R-CC)-AS  | CGGTACctatGCCCAgcatgacaaagactatgctttaaTC   |
| TTR-T2 (A-CC)-SS  | GTCGGAtttaaagcatagtctttgtcatCTAGGCataGGT   |
| TTR-T2 (A-CC)-AS  | CGGTACctatGCCTAGatgacaaagactatgctttaaTC    |
| TTR-T3 (R-CC)-SS  | GTCGGAtttagggcatttaaagaaaaccAAGAAAataGGT   |
| TTR-T3 (R-CC)-AS  | CGGTACctatTTTCTTggtttttctttaaagccctaaTC    |
| TTR-T3 (A-CC)-SS  | GTCGGAtttagggcatttaaagaaaaccAACAAAataGGT   |
| TTR-T3 (A-CC)-AS  | CGGTACctatTTTGTTggtttttctttaaagccctaaTC    |
| TTR-T4 (R-CC)-SS  | GTCGGAtgtatgcaatctccatgctttccTCGGGCataGGT  |
| TTR-T4 (R-CC)-AS  | CGGTACctatGCCCCGaggaaagcatggagattgcatacaTC |
| TTR-T4 (A-CC)-SS  | GTCGGAtgtatgcaatctccatgctttccTCAGGCataGGT  |
| TTR-T4 (A-CC)-AS  | CGGTACctatGCCTGAggaaagcatggagattgcatacaTC  |
| TTR-T5 (R-CC)-SS  | GTCGGAtgactgggccttgagaggttcCCGAACataGGT    |
| TTR-T5 (R-CC)-AS  | CGGTACctatGTTCCGgaaacctctcaaggccaagtcaTC   |
| TTR-T5 (A-CC)-SS  | GTCGGAtgactgggccttgagaggttcCCAACataGGT     |
| TTR-T5 (A-CC)-AS  | CGGTACctatGTTTGgaaacctctcaaggccaagtcaTC    |
| TTR-T6 (R-CC)-SS  | GTCGGAtacaaatgcaccgcaccgatgcAAGAAgataGGT   |
| TTR-T6 (R-CC)-AS  | CGGTACctatCTTCTTgcatcggtgcggtgcatttgaTC    |
| TTR-T6 (A-CC)-SS  | GTCGGAtacaaatgcaccgcaccgatgcAAGATgataGGT   |
| TTR-T6 (A-CC)-AS  | CGGTACctatCATCTTgcatcggtgcggtgcatttgaTC    |
| TTR-T7 (R-CC)-SS  | GTCGGAttgtgtctgagctgactttgcCTGAGTataGGT    |
| TTR-T7 (R-CC)-AS  | CGGTACctatACTCAGgcaaagtcagactcagaccaaTC    |
| TTR-T7 (A-CC)-SS  | GTCGGAttgtgtctgagctgactttgcCTGACTataGGT    |
| TTR-T7 (A-CC)-AS  | CGGTACctatAGTCAGgcaaagtcagactcagaccaaTC    |
| TTR-T8 (R-CC)-SS  | GTCGGAtccctgtccacagaagtccagCTGAGTataGGT    |
| TTR-T8 (R-CC)-AS  | CGGTACctatACTCAGctgggacttctgtggacaggggaTC  |
| TTR-T8 (A-CC)-SS  | GTCGGAtccctgtccacagaagtccagCTCAGTataGGT    |
| TTR-T8 (A-CC)-AS  | CGGTACctatACTGAGctgggacttctgtggacaggggaTC  |
| TTR-T9 (R-CC)-SS  | GTCGGAtattcctatttcgtaacagggCAGAACataGGT    |
| TTR-T9 (R-CC)-AS  | CGGTACctatGTTCTGccctgtaacgaaataggaataTC    |
| TTR-T9 (A-CC)-SS  | GTCGGAtattcctatttcgtaacagggCAAAACataGGT    |
| TTR-T9 (A-CC)-AS  | CGGTACctatGTTTTGccctgtaacgaaataggaataTC    |
| TTR-T10 (R-CC)-SS | GTCGGAtaatgaaggtgagaagccactcTTGGACataGGT   |
| TTR-T10 (R-CC)-AS | CGGTACctatGTCCAAgagtggttctcaccttcattaTC    |
| TTR-T10 (A-CC)-SS | GTCGGAtaatgaaggtgagaagccactcTTGCACataGGT   |
| TTR-T10 (A-CC)-AS | CGGTACctatGTGCAAgagtggttctcaccttcattaTC    |
| TTR-T11 (R-CC)-SS | GTCGGAtaggtaggcagatctattactcGAGGGTataGGT   |
| TTR-T11 (R-CC)-AS | CGGTACctatACCCTCgagtaatagatctgcctacctaTC   |
| TTR-T11 (A-CC)-SS | GTCGGAtaggtaggcagatctattactcGAGGTTataGGT   |
| TTR-T11 (A-CC)-AS | CGGTACctatAACCTCgagtaatagatctgcctacctaTC   |

**Table S3. C-Check oligos used in the research (HTT and TTR locus)**

|                   |                                          |
|-------------------|------------------------------------------|
| TTR-T12 (R-CC)-SS | GTCGGAtccacagtaaagaagtgggcccTTGGAAataGGT |
| TTR-T12 (R-CC)-AS | CGGTACCtatTTCCAAgggcccacttctttactgtggaTC |
| TTR-T12 (A-CC)-SS | GTCGGAtccacagtaaagaagtgggcccTTAGAAataGGT |
| TTR-T12 (A-CC)-AS | CGGTACCtatTTCTAAgggcccacttctttactgtggaTC |
| TTR-T13 (R-CC)-SS | GTCGGAtctcctagatgtaacgcgctgaGAGGAAataGGT |
| TTR-T13 (R-CC)-AS | CGGTACCtatTCCTCtcagcgcttacatctaggagaTC   |
| TTR-T13 (A-CC)-SS | GTCGGAtctcctagatgtaacgcgctgaGAAGAAataGGT |
| TTR-T13 (A-CC)-AS | CGGTACCtatTTCTTtcagcgcttacatctaggagaTC   |
| TTR-T14 (R-CC)-SS | GTCGGAtttttaatcatttcaattatccTCGGGTataGGT |
| TTR-T14 (R-CC)-AS | CGGTACCtatACCCGAggataattgaaatgattaaaaTC  |
| TTR-T14 (A-CC)-SS | GTCGGAtttttaatcatttcaattatccTCAGGTataGGT |
| TTR-T14 (A-CC)-AS | CGGTACCtatACCTGAggataattgaaatgattaaaaTC  |

**Table S4. Primers for CRISPR-hapC and eccDNA PCR-based genotyping**

| Primer name       | Oligo sequence (5' -3' )  |
|-------------------|---------------------------|
| <b>TTR Gene</b>   |                           |
| P1                | GCCGTGCCTTGTGATAACTCTG    |
| P2                | CTGGCTTAGTCATGGATGAGAC    |
| P3                | CACATACATGATCACATGTAGG    |
| P4                | CTCTACTGTCTGCCCCCTAAATG   |
| P5                | TGATAGCAGTGTGTCTGGAGGC    |
| P6                | TACGTCTGTGTTATACTGAGTAGG  |
| P7                | CTGAGTAGGGAAGCTCATTAAATTG |
| P8                | GAGCAGACAAGGAAGCTAAGATCT  |
| P9                | TTCTCCAGCACGTATTTCTCAG    |
| <b>HTT Gene</b>   |                           |
| HTT-del-scr-R     | ggttgctgggtcactctgtc      |
| HTT-ECCuni-TIDE-F | tgcctcaccaccattacagtct    |
| HD1               | ccttcgagtcctcaagtccttc    |
| HD3               | cggcggtggcggtctgtg        |

**Primers combinations for PCRs**

| Primers combination | Primers combination            | Purpose                               | PCR product length  |
|---------------------|--------------------------------|---------------------------------------|---------------------|
| <b>TTR</b>          | P1+P2                          | TTR SNP3-SNP11 linkage                | 624 bp              |
|                     | P1+P3                          | TTR SNP3-SNP14 linkage                | 636 bp              |
|                     | P1+P5                          | TTR SNP3-Exon2 mutation linkage       | 688 bp              |
|                     | P2+P4                          | TTR Allele-specific KO detection(ECC) | 672 bp              |
|                     | P3+P4                          | TTR Allele-specific KO detection(ECC) | 648 bp              |
|                     | P7+P8                          | Allele-specific KO detection (del)    | 305 bp              |
|                     | P6+P9                          | Allele-specific KO detection (del)    | 399 bp              |
| <b>HTT</b>          | HTT-SNP2-scr-F + HTT-del-scr-R | CAG repeat-SNP linkage                | 939 bp (23 repeat)  |
|                     | HTT-SNP3-scr-F + HTT-del-scr-R | CAG repeat-SNP linkage                | 888 bp (23 repeat)  |
|                     | HTT-SNP5-scr-F + HTT-del-scr-R | CAG repeat-SNP linkage                | 893 bp (23 repeat)  |
|                     | HTT-SNP7-scr-F + HTT-del-scr-R | CAG repeat-SNP linkage                | 1015 bp (23 repeat) |
|                     | HTT-SNP8-scr-F + HTT-del-scr-R | CAG repeat-SNP linkage                | 983 bp (23 repeat)  |
|                     | HTT-SNP9-scr-F + HTT-del-scr-R | CAG repeat-SNP linkage                | 1065 bp (23 repeat) |

**Table S4. Primers for CRISPR-hapC and eccDNA PCR-based genotyping**

|  |                                    |                                                                 |                            |
|--|------------------------------------|-----------------------------------------------------------------|----------------------------|
|  | HTT-ECCuni-TIDE-F + HTT-SNP3-scr-R | Junction sequence detection                                     | 373 bp for uni-T1 and SNP3 |
|  | HTT-ECCuni-TIDE-F + HTT-SNP9-scr-R | Junction sequence detection                                     | 496 bp for uni-T1 and SNP9 |
|  | HTT-SNP3-scr-F + HTT-del-scr-R     | Nest PCR for Allele-specific KO detection-1 <sup>st</sup> round |                            |
|  | HTT-SNP9-scr-F + HTT-del-scr-R     | Nest PCR for Allele-specific KO detection-1 <sup>st</sup> round |                            |
|  | HD1 +HD3                           | Nest PCR for Allele-specific KO detection-2 <sup>nd</sup> round |                            |
|  |                                    |                                                                 |                            |

Table S5. genotype and linkage pattern of TTR-mutation cell clones tested in this research

| TTR Cell Clone ID | Alleles | SNP3 | sequence at TTR mutation locus      | Mutation genotype | SNP11 | SNP14 |
|-------------------|---------|------|-------------------------------------|-------------------|-------|-------|
| #2                | 1       | aPAM | GTGGCCGTG.....CTGCTGAT              | Δ 16 bp           | aPAM  | aPAM  |
|                   | 2       | dPAM | GTGGCCGTGCATGTGTTCAAGAAAGGCTGCTGAT  | + 1 bp            | dPAM  | dPAM  |
|                   | 3       | dPAM | GTGGCCGTGCATGTGTTCAAGAAAGGCTGCTGAT  | WT                | dPAM  | dPAM  |
| #7                | 1       | aPAM | GTGGCCGTGCATGTGTT.....GCTGAT        | Δ 10 bp           | aPAM  | aPAM  |
|                   | 2       | aPAM | GTGGCCGTGCATGTGTTCAAGAAAGGCTGCTGAT  | + 1 bp            | aPAM  | aPAM  |
|                   | 3       | dPAM |                                     |                   | dPAM  | dPAM  |
| #12               | 1       | aPAM | GTGGCCGTGCATGTGTT.....GCTGAT        | Δ 10 bp           | aPAM  | aPAM  |
|                   | 2       | aPAM | GTGGCCGTGCATGTGTTCAAGAAAGGCTGCTGAT  | + 1 bp            | aPAM  | aPAM  |
|                   | 3       | dPAM | GTGGCCGTGCATGTGTTCAAGAAAGGCTGCTGAT  | + 1 bp            | dPAM  | dPAM  |
| #13               | 1       | aPAM | GTGGCCGTGCATGTGTTCAAGAAAGGCTGCTGAT  | + 1 bp            | aPAM  | aPAM  |
|                   | 2       | aPAM | GTGGCCGTGCATGTGTTCAAGAAAGGCTGCTGAT  | WT                | aPAM  | aPAM  |
|                   | 3       | dPAM | GTGGCCGTGCATGTGTTCAAGAAAGGCTGCTGAT  | WT                | dPAM  | dPAM  |
|                   | 4       | dPAM | GTGGCCGTGCATGTGTTCAAGAAAGGCTGCTGAT  | + 1 bp            | dPAM  | dPAM  |
| #14               | 1       | aPAM | GTGGCCGTGCATGTGTTCAAGAAAGGCTGCTGAT  | + 1 bp            | aPAM  | aPAM  |
|                   | 2       | aPAM | GTGGCCGTGCATGTGTTCAAGAAAGGCTGCTGAT  | WT                | aPAM  | aPAM  |
|                   | 3       | dPAM |                                     |                   | dPAM  | dPAM  |
| #16               | 1       | aPAM | GTGGCCGTGCATGTGTTCA.....CTGCTGAT    | Δ 5 bp            | aPAM  | aPAM  |
|                   | 2       | aPAM | GTGGC.....TGCTGAT                   | Δ 21 bp           | aPAM  | aPAM  |
|                   | 3       | dPAM | GTGGC.....TGCTGAT                   | Δ 21 bp           | dPAM  | dPAM  |
| #21               | 1       | aPAM | GTGGCCGTGCATGTGTTCAAGAAAGGCTGCTGAT  | + 1 bp            | aPAM  | aPAM  |
|                   | 2       | dPAM | GTGGCCGTGCTGCTGATG.....AGGCTGCTGAT  | Δ 4 bp            | dPAM  | dPAM  |
|                   | 3       | *ND  | GTGGCCGTGCATGTGTTCA.....AGGCTGCTGAT | Δ 4 bp            | ND    | ND    |

\*ND means not detected
